# Supplementary material
Source: PubMed Central journal article supplement (PMC6071988)

**Note to readers with disabilities:** *EHP* strives to ensure that all journal content is accessible to all readers. However, some figures and Supplemental Material published in *EHP* articles may not conform to [508 standards](#) due to the complexity of the information being presented. If you need assistance accessing journal content, please contact [ehp508@niehs.nih.gov](mailto:ehp508@niehs.nih.gov). Our staff will work with you to assess and meet your accessibility needs within 3 working days.

### **Supplemental Material**

#### **Changing Susceptibility to Non-Optimum Temperatures in Japan, 1972-2012: The Role of Climate, Demographic, and Socioeconomic Factors**

Yeonseung Chung, Daewon Yang, Antonio Gasparrini, Ana M. Vicedo-Cabrera, Chris Fook Sheng Ng, Yoonhee Kim, Yasushi Honda, and Masahiro Hashizume

#### **Table of Contents**

##### **Details for statistical methods.**

**Table S1.** Summary statistics for daily mortality and mean temperature (study period: 1972.01.01 - 2012.12.31 for Hokkaido-Nagasaki, 1973.01.01 - 2012.12.31 for Okinawa).

**Table S2.** Prefecture-specific average of yearly measurements for each meta-variable.

**Table S3.** Association between each aspect (MMT, heat- and cold-related mortality risks) and each meta-variable in female mortality.

**Table S4.** Association between each aspect (MMT, heat- and cold-related mortality risks) and each meta-variable in male mortality.

**Figure S1.** Map of the 47 prefectures in Japan. Blue and red indicate the eastern and western prefectures, respectively.

**Figure S2.** Time-series plot for each of the prefecture-specific meta-variables. Blue and red indicate the eastern and western prefectures, respectively.

**Figure S3.** Prefecture-specific time-varying temperature distribution (minimum, 1<sup>st</sup>, 25<sup>th</sup>, 50<sup>th</sup>, 75<sup>th</sup>, 99<sup>th</sup> percentiles, and maximum). At each time point, a temperature distribution was defined using the daily mean temperatures for the 6-year moving period with the specific time point as a center.

**Figure S4.** Region-specific time-varying minimum mortality temperature (MMT) together with the time-varying minimum mortality temperature percentile (MMTP) (top), time-varying heat-related mortality risk (middle), and time-varying cold-related mortality risk (bottom). Black solid and dashed lines indicate the point estimate of the MMT and 95% point-wise confidence intervals, respectively. Blue line in the top panels indicates the MMTP.

**Figure S5.** Prefecture-specific time-varying minimum mortality temperature (MMT) and minimum mortality temperature percentile (MMTP). Black solid and dashed lines indicate the point estimate of the MMT and 95% point-wise confidence intervals, respectively. Blue line indicates the MMTP.

**Figure S6.** Prefecture-specific time-varying heat-related mortality risk. The heat-related risk was defined as the relative risk comparing the time-varying minimum mortality temperature (MMT) and the time-varying 99<sup>th</sup> temperature percentile. Black solid and dashed lines indicate the point estimate of the heat risk and 95% point-wise confidence intervals, respectively.

**Figure S7.** Prefecture-specific time-varying cold-related mortality risk. The cold-related risk was defined as the relative risk comparing the time-varying minimum mortality temperature (MMT) and the time-varying 1<sup>st</sup> temperature percentile. Black solid and dashed lines indicate the point estimate of the heat risk and 95% point-wise confidence intervals, respectively.

**Figure S8.** Prefecture-specific lag-cumulative relative risk (RR) curve at the first/last years (1972/2012) of the study period. Green and blue solid lines with shaded areas indicate the estimated RR curves with 95% confidence regions in 1972 and in 2012, respectively.

**Figure S9.** Gender-specific time-varying minimum mortality temperature (MMT) together with the time-varying minimum mortality temperature percentile (MMTP) (top), time-varying heat-related mortality risk (middle), and time-varying cold-related mortality risk (bottom). Black solid and dashed lines indicate the point estimate of the MMT and 95% point-wise confidence intervals, respectively. Blue line in the top panels indicates the MMTP.

**Figure S10.** Cause-specific time-varying minimum mortality temperature (MMT) together with the time-varying minimum mortality temperature percentile (MMTP) (top), time-varying heat-related mortality risk (middle), and time-varying cold-related mortality risk (bottom). Black solid and dashed lines indicate the point estimate of the MMT and 95% point-wise confidence intervals, respectively. Blue line in the top panels indicates the MMTP.

## Details for statistical methods

### *Two-stage modeling*

The first stage models the time-varying association between temperature and mortality for each prefecture. For  $i$ -th prefecture, let  $y_{it}$  be the daily death count on day  $t$ ,  $\mathbf{x}_{it} = (x_{it}, x_{it-1}, \dots, x_{it-L})'$  be the vector of daily mean temperatures on day  $t$  and over the previous  $L$  days and  $T_t$  be a variable representing time on day  $t$ . We use the following generalized linear model with a quasi-Poisson family.

$$y_{it} \sim \text{quasi-Poisson}(\lambda_{it}),$$

$$\log(\lambda_{it}) = \alpha_{i0} + s_i(\mathbf{x}_{it}, T_t; \boldsymbol{\beta}_i) + \sum_{j=1}^J h_{ij}(u_{ijt}; \boldsymbol{\gamma}_{ij}), \text{ for } t = L + 1, \dots, N, \quad (1)$$

where  $\lambda_{it} \equiv E(y_{it})$  is the expected mortality count for  $i$ -th prefecture on day  $t$ ,  $\alpha_{i0}$  is a model intercept,  $u_{ijt}$  is  $j$ -th control variable for  $i$ -th prefecture on day  $t$ ,  $h_{ij}(\cdot)$  is a flexible function to represent the effect of  $j$ -th control variable for  $i$ -th prefecture, characterized by  $\boldsymbol{\gamma}_{ij}$ . In our analysis,  $h_{ij}(\cdot)$  include a natural cubic B-spline of time with 8 degrees of freedom (df) per year to control for seasonality and long-term time trend and indicator variables to control for the day of week.

In equation (1),  $s_i(\cdot)$  is a flexible function to describe a time-varying, nonlinear and delayed association between temperature and mortality, and we use a time-varying distributed lag nonlinear model (TV-DLNM) as follows. We first define a cross-basis (CB) for temperature and lag as in the time-constant DLNM. Let  $f_1(\cdot), \dots, f_{v_x}(\cdot)$  be the basis to describe the nonlinear temperature-mortality association with dimension  $v_x$  and let  $g_1(\cdot), \dots, g_{v_l}(\cdot)$  be the basis to describe the relationship along the lag space. Then, the TV-DLNM for  $s_i(\cdot)$  is expressed as follows

$$s(\mathbf{x}_{it}, T_t; \boldsymbol{\beta}_i) = \sum_{j=1}^{v_x} \sum_{k=1}^{v_l} \mathbf{r}'_{i,t,j} \cdot \mathbf{c}_{\cdot k} \beta_{i,jk0} + T_t \sum_{j=1}^{v_x} \sum_{k=1}^{v_l} \mathbf{r}'_{i,t,j} \cdot \mathbf{c}_{\cdot k} \beta_{i,jk1} \quad (2)$$

where  $\mathbf{r}_{i,t,j} = (f_j(x_{it}), \dots, f_j(x_{it-L}))'$  is the transformed vector using  $j$ -th basis  $f_j$  in the temperature dimension and  $\mathbf{c}_{\cdot k} = (g_k(0), \dots, g_k(L))'$  is the transformed vector using  $k$ -th basis  $g_k$  in the lag dimension. The coefficient vector  $\boldsymbol{\beta}_i = (\beta_{i,110}, \beta_{i,120}, \dots, \beta_{i,v_x v_l 1})'$  has the length of  $v_x \times v_l \times 2$  and is divided into the coefficients for the main term of the CB,  $\boldsymbol{\beta}_i =$

$(\beta_{i,110}, \beta_{i,120}, \dots, \beta_{i,v_x v_l 0})'$  and the coefficients for the interaction between the CB and time,  $\boldsymbol{\beta}_i = (\beta_{i,111}, \beta_{i,121}, \dots, \beta_{i,v_x v_l 1})'$ , with the length of  $v_x \times v_l$  for each. In our analysis, we use a quadratic B-spline for temperature with three internal knots and a natural cubic spline for the lag with three internal knots and thus,  $v_x = 5$  and  $v_l = 5$ . Therefore, the coefficients in  $s_i(\cdot)$  are  $5 \times 5 \times 2 = 50$ .

Because of the high dimensionality, we reduce the coefficients over the lag space as follows.

$$\boldsymbol{\theta}_i = \mathbf{M}_1 \boldsymbol{\beta}_i$$

$$V(\boldsymbol{\theta}_i) = \mathbf{M}_1 V(\boldsymbol{\beta}_i) \mathbf{M}_1' \quad (3)$$

where  $\boldsymbol{\beta}_i$  is the set of 50 coefficients,  $\mathbf{M}_1 = \mathbf{I}_{2 \times v_x} \otimes \mathbf{1}'_{L+1} \mathbf{C}$  is a reducing matrix,  $\boldsymbol{\theta}_i = (\theta_{i,1,0}, \theta_{i,2,0}, \dots, \theta_{i,v_x,0})'$  is the set of reduced coefficient with length of  $v_x \times 2$ , and  $V(\boldsymbol{\theta}_i)$  is the associated error covariance matrix. The  $\boldsymbol{\theta}_i$  is divided into the ones for the main term,  $\boldsymbol{\theta}_i = (\theta_{i,1,0}, \theta_{i,2,0}, \dots, \theta_{i,v_x,0})'$  and the ones for the interaction,  $\boldsymbol{\theta}_i = (\theta_{i,1,1}, \theta_{i,2,1}, \dots, \theta_{i,v_x,1})'$  with length of  $v_x$  for each. In our analysis, as  $v_x = 5$ , the reduced set of coefficients  $\boldsymbol{\theta}_i$  include 10 coefficients, 5 for the main term and 5 for the interaction. The 10 coefficients represent the time-varying temperature-mortality association cumulated over the lags. Then, in the second stage, we apply a multivariate meta-analysis using the 10 coefficients and their standard error matrices obtained from the first stage modeling and obtain a pooled estimate and the best linear unbiased predictor (BLUP) for  $\boldsymbol{\theta}_i$  and its error matrices.

### *Estimating the time-varying MMT, heat- and cold-related mortality risks*

Let  $\widehat{\boldsymbol{\theta}}_i$  be the BLUP and  $V(\widehat{\boldsymbol{\theta}}_i)$  be the corresponding error matrix. Using them, we first estimate the time-varying MMT over a grid of every 10 days for the whole study period. Let  $T_t$  represent a specific time point. Then, the MMT at that time point, denoted by  $MMT_{T_t}$ , can be derived as follows.

$$\widehat{\boldsymbol{\eta}}_{l,x} = \mathbf{M}_{2,x} \widehat{\boldsymbol{\theta}}_i = (\widehat{\eta}_{l,x,0}, \quad \widehat{\eta}_{l,x,1})'$$

$$MMT_{T_t} = \operatorname{argmin}_x (\widehat{\eta}_{l,x,0} + T_t \times \widehat{\eta}_{l,x,1}) \quad (4)$$

where  $\mathbf{M}_{2,x} = \mathbf{I}_2 \otimes \mathbf{q}'_x$  is the reducing matrix and  $\mathbf{q}_x$  is the vector of a specific temperature  $x$  transformed through the basis for temperature. However, the solution in (4) serves as a point estimate only and a confidence interval cannot be calculated. Therefore, we use a Monte Carlo simulation method (ref) to obtain the empirical distribution of the MMT at a given time  $T_t$ . We first simulate  $\boldsymbol{\theta}_i$ 's from a multivariate normal distribution with mean as the BLUP and the covariance as the standard error matrix and calculate the MMT for each simulated  $\boldsymbol{\theta}_i$  in the same way as in (4). The procedure is expressed as follows.

$$\begin{aligned}\boldsymbol{\theta}_{i,(j)} &\sim N(\widehat{\boldsymbol{\theta}}_i, V(\widehat{\boldsymbol{\theta}}_i)) \\ \boldsymbol{\eta}_{i,(j),x} &= \mathbf{M}_{2,x}\boldsymbol{\theta}_{i,(j)} \\ MMT_{T_t,(j)} &= \operatorname{argmin}_x(\eta_{i,(j),x,0} + T_t \times \eta_{i,(j),x,1}) \quad (5)\end{aligned}$$

where  $(j)$  indicates  $j$ -th simulated sample. We obtain 1,500 samples of the  $MMT_{T_t}$  through the procedure (5) and use the sample mean as a point estimate and the sample 2.5<sup>th</sup> and 97.5<sup>th</sup> percentiles as an interval estimate for the MMT.

Next, we estimate the time-varying heat- and cold-related mortality risks over a grid of every 10 days for the whole study period. At a specific time point  $T_t$ , the heat- and cold-related mortality risks are calculated as follows.

$$\begin{aligned}\text{Heat Risk}_{T_t} &= \exp\{(1, T_t) \times (\mathbf{M}_{2,x_{\text{heat},T_t}}\widehat{\boldsymbol{\theta}}_i - \mathbf{M}_{2,MMT_{T_t}}\widehat{\boldsymbol{\theta}}_i)\} \\ \text{Cold Risk}_{T_t} &= \exp\{(1, T_t) \times (\mathbf{M}_{2,x_{\text{cold},T_t}}\widehat{\boldsymbol{\theta}}_i - \mathbf{M}_{2,MMT_{T_t}}\widehat{\boldsymbol{\theta}}_i)\} \quad (6)\end{aligned}$$

where  $x_{\text{heat},T_t}$  and  $x_{\text{cold},T_t}$  are the 99<sup>th</sup> and the 1<sup>st</sup> percentile, respectively, of the temperature distribution at a specific time  $T_t$ . Also, pointwise confidence intervals were calculated through the corresponding transformation of  $V(\widehat{\boldsymbol{\theta}}_i)$ .

### *Investigating the relation with prefecture-specific meta-variables*

Let  $y_{ij}$  be  $i$ th prefecture's estimated aspect (MMT, heat or cold risks) at time point  $j$ . The logged values of RR were used as  $y_{ij}$  for the heat and cold risks. Let  $x_{ij}$  be  $i$ th prefecture's meta-

variable observed at time  $j$ . Then, for each aspect and each meta-variable, we fit the following linear mixed effects model (LMEM). For  $i=1,\dots,46$  (excluding Okinawa) and  $j=1,\dots, T$  ( $T$  is the number of yearly time points and ranges from 8 to 41 depending on the meta-variable),

$$E(y_{ij}) = \alpha_{i0} + x_{ij}\alpha_1 + f_i(\text{Time}_{ij}; \boldsymbol{\beta}_i) + \text{longitude}_i + \text{latitude}_i + e_{ij}, \quad (7)$$

where  $\alpha_{i0}$  is  $i$ th prefecture-specific intercept (a combination of fixed intercept and random intercept),  $\text{Time}_{ij}$  represents the time at  $j$ th time point for  $i$ th prefecture (the years for which each meta-variable is available),  $f_i(\cdot)$  is a flexible function characterized by  $\boldsymbol{\beta}_i$  to adjust for prefecture-specific nonlinear time trends, and  $e_{ij}$  are residuals with a 1<sup>st</sup> order autoregressive (AR(1)) within-prefecture residual correlation structure. For  $f_i(\cdot)$ , we used natural cubic spline with two internal knots placed at 1985 and 2000 for all meta-variables except for EPI. For EPI, we used a linear function because the yearly measurements were available only after 2003. Then,  $\alpha_1$  represents the association between each aspect and each meta-variable, as the change in MMT, or in the log of heat/cold risks per unit change in each meta-variable. Each-meta variable was properly scaled such that the estimate for  $\alpha_1$  is not a value too close to zero. For fitting model (7) and estimating  $\alpha_1$ , we used the maximum likelihood estimation with weights given for  $y_{ij}$  as an inverse of the squared standard error for the estimated aspect to incorporate uncertainty.

**Table S1.** Summary statistics for daily mortality and mean temperature (study period: 1972.01.01 - 2012.12.31 for Hokkaido-Nagasaki, 1973.01.01 - 2012.12.31 for Okinawa)

| Region | Prefecture name | Latitude (° N) | Longitude (° E) | Total deaths | Average daily deaths | Distribution of daily mean temperature (°C) |      |      |      |      |      |      |
|--------|-----------------|----------------|-----------------|--------------|----------------------|---------------------------------------------|------|------|------|------|------|------|
|        |                 |                |                 |              |                      | Min                                         | 1st  | 25th | 50th | 75th | 99th | Max  |
| East   | Hokkaido        | 43.06          | 141.35          | 1636834      | 109.3                | -14.1                                       | -8.3 | 0.1  | 9.2  | 17.2 | 25.9 | 30.1 |
| East   | Iwate           | 39.70          | 141.15          | 487277       | 32.5                 | -8.9                                        | -6.2 | 1.6  | 10.3 | 18.3 | 27.0 | 29.6 |
| East   | Miyagi          | 38.27          | 140.87          | 638639       | 42.6                 | -5.2                                        | -2.1 | 4.8  | 12.8 | 19.1 | 27.8 | 31.2 |
| East   | Aomori          | 40.82          | 140.74          | 495285       | 33.1                 | -8.7                                        | -5.3 | 2.1  | 10.6 | 17.9 | 27.0 | 30.1 |
| East   | Fukushima       | 37.75          | 140.47          | 711527       | 47.5                 | -5.2                                        | -2.2 | 4.8  | 13.3 | 20.2 | 29.1 | 31.4 |
| East   | Ibaraki         | 36.34          | 140.45          | 855768       | 57.1                 | -3.8                                        | -0.2 | 6.1  | 14.1 | 20.2 | 28.4 | 31.3 |
| East   | Yamagata        | 38.24          | 140.36          | 458516       | 30.6                 | -7.4                                        | -4.1 | 3.0  | 11.9 | 19.7 | 28.2 | 31.5 |
| East   | Chiba           | 35.60          | 140.12          | 1335634      | 89.2                 | -1.4                                        | 2.0  | 8.6  | 16.1 | 22.0 | 29.3 | 32.2 |
| East   | Akita           | 39.72          | 140.10          | 450848       | 30.1                 | -6.4                                        | -3.7 | 3.3  | 11.6 | 19.6 | 28.2 | 31.6 |
| East   | Tochigi         | 36.57          | 139.88          | 597355       | 39.9                 | -4.5                                        | -1.0 | 5.8  | 14.3 | 20.8 | 28.7 | 31.4 |
| East   | Tokyo           | 35.69          | 139.69          | 3056617      | 204.1                | -0.6                                        | 2.6  | 9.0  | 16.5 | 22.5 | 30.1 | 33.1 |
| East   | Saitama         | 35.86          | 139.65          | 1437142      | 96.0                 | -2.8                                        | 0.7  | 7.1  | 15.3 | 21.8 | 30.1 | 33.7 |
| East   | Kanagawa        | 35.45          | 139.64          | 1785316      | 119.2                | -1.0                                        | 2.4  | 8.8  | 16.1 | 21.9 | 29.0 | 30.9 |
| East   | Gunma           | 36.39          | 139.06          | 612478       | 40.9                 | -3.8                                        | 0.0  | 6.7  | 14.8 | 21.5 | 29.9 | 32.6 |
| East   | Niigata         | 37.90          | 139.02          | 844622       | 56.4                 | -3.9                                        | -0.9 | 5.8  | 13.9 | 21.2 | 29.5 | 32.6 |
| East   | Yamanashi       | 35.66          | 138.57          | 287196       | 19.2                 | -4.4                                        | -0.4 | 6.5  | 15.1 | 22.1 | 29.1 | 31.8 |
| East   | Shizuoka        | 34.98          | 138.38          | 1052669      | 70.3                 | -0.9                                        | 3.2  | 9.9  | 17.0 | 22.7 | 29.2 | 31.9 |
| East   | Nagano          | 36.65          | 138.18          | 741340       | 49.5                 | -7.7                                        | -4.3 | 3.0  | 12.4 | 20.3 | 28.  | 30.7 |
| East   | Toyama          | 36.70          | 137.21          | 379473       | 25.3                 | -4.4                                        | -1.3 | 6.1  | 14.3 | 21.3 | 29.8 | 33.8 |
| East   | Aichi           | 35.18          | 136.91          | 1683493      | 112.4                | -2.9                                        | 0.8  | 7.9  | 16.2 | 22.9 | 30.3 | 32.7 |
| East   | Gifu            | 35.39          | 136.72          | 626398       | 41.8                 | -3.0                                        | 0.6  | 7.9  | 16.2 | 23.1 | 30.5 | 32.9 |
| East   | Ishikawa        | 36.59          | 136.63          | 365554       | 24.4                 | -3.9                                        | -0.4 | 6.9  | 14.9 | 21.8 | 29.7 | 32.3 |
| West   | Mie             | 34.73          | 136.51          | 587047       | 39.2                 | -2.4                                        | 1.6  | 8.3  | 16.1 | 22.8 | 30.2 | 33.5 |
| East   | Fukui           | 36.07          | 136.22          | 242150       | 18.2                 | -3.8                                        | -0.3 | 6.4  | 14.9 | 22.0 | 30.0 | 32.1 |
| West   | Shiga           | 35.00          | 135.87          | 354703       | 23.7                 | -3.2                                        | 0.1  | 6.8  | 14.8 | 22.0 | 29.4 | 31.4 |
| West   | Nara            | 34.69          | 135.83          | 388331       | 25.9                 | -3.7                                        | 0.5  | 6.9  | 15.1 | 22.1 | 29.1 | 31.7 |
| West   | Kyoto           | 35.02          | 135.76          | 772252       | 51.6                 | -3.4                                        | 1.1  | 7.9  | 16.2 | 23.2 | 30.5 | 32.8 |
| West   | Osaka           | 34.69          | 135.52          | 2276669      | 152.0                | -2.1                                        | 2.4  | 9.1  | 17.2 | 23.9 | 30.8 | 32.9 |
| West   | Hyogo           | 34.69          | 135.18          | 1587308      | 106.0                | -4.3                                        | 1.3  | 8.8  | 16.8 | 23.2 | 29.9 | 32.0 |
| West   | Wakayama        | 34.23          | 135.17          | 398680       | 26.6                 | -2.7                                        | 2.6  | 9.1  | 17.0 | 23.5 | 29.9 | 31.9 |
| West   | Tokushima       | 34.07          | 134.56          | 309974       | 20.7                 | -4.0                                        | 2.3  | 9.2  | 17.0 | 23.3 | 29.8 | 32.3 |
| West   | Tottori         | 35.50          | 134.24          | 226586       | 15.1                 | -5.6                                        | 0.1  | 7.3  | 15.0 | 21.9 | 29.9 | 32.3 |
| West   | Kagawa          | 34.34          | 134.04          | 355744       | 23.8                 | -3.3                                        | 2.0  | 8.5  | 16.4 | 23.2 | 30.5 | 32.3 |

|      |           |       |        |         |      |      |      |      |      |      |      |      |
|------|-----------|-------|--------|---------|------|------|------|------|------|------|------|------|
| West | Okayama   | 34.66 | 133.94 | 652830  | 43.6 | -4.8 | 0.8  | 7.9  | 16.2 | 23.2 | 30.6 | 32.3 |
| West | Kochi     | 33.56 | 133.53 | 332332  | 22.2 | -2.3 | 2.2  | 10.1 | 17.6 | 23.6 | 29.4 | 32.1 |
| West | Shimane   | 35.47 | 133.05 | 309673  | 20.7 | -5.3 | 0.4  | 7.5  | 15.0 | 21.6 | 29.4 | 32.2 |
| West | Ehime     | 33.84 | 132.77 | 539865  | 36.0 | -3.1 | 2.1  | 9.1  | 16.6 | 23.1 | 29.8 | 31.9 |
| West | Hiroshima | 34.40 | 132.46 | 883124  | 59.0 | -5.8 | 1.1  | 8.3  | 16.2 | 23.0 | 30.2 | 32.7 |
| West | Oita      | 33.24 | 131.61 | 440295  | 29.4 | -3.4 | 2.3  | 9.4  | 16.7 | 22.9 | 29.6 | 31.6 |
| West | Yamaguchi | 34.19 | 131.47 | 573274  | 38.3 | -5.4 | 0.4  | 7.7  | 15.7 | 22.6 | 29.3 | 31.2 |
| West | Miyazaki  | 31.91 | 131.42 | 390734  | 26.1 | -1.0 | 3.3  | 11.0 | 18.1 | 23.8 | 29.9 | 32.0 |
| West | Kumamoto  | 32.79 | 130.74 | 631598  | 42.2 | -3.2 | 1.3  | 9.5  | 17.5 | 24.0 | 30.2 | 31.5 |
| West | Kagoshima | 31.56 | 130.56 | 686996  | 45.9 | -2.1 | 3.6  | 12.0 | 18.9 | 24.8 | 30.1 | 31.1 |
| West | Fukuoka   | 33.61 | 130.42 | 1447571 | 96.7 | -3.2 | 2.4  | 9.9  | 17.1 | 23.3 | 30.5 | 32.4 |
| West | Saga      | 33.25 | 130.30 | 309797  | 20.7 | -3.6 | 1.5  | 9.2  | 16.9 | 23.6 | 30.0 | 32.2 |
| West | Nagasaki  | 32.74 | 129.87 | 538568  | 36.0 | -2.5 | 2.5  | 10.5 | 17.6 | 23.5 | 29.7 | 32.2 |
| West | Okinawa   | 26.21 | 127.68 | 282393  | 19.3 | 9.1  | 12.9 | 19.2 | 23.3 | 27.2 | 30.0 | 31.1 |

---



**Table S2.** Prefecture-specific average of yearly measurements for each meta-variable

| Region | Prefecture Name | Climate variable <sup>a</sup> |            |           |            | Demographic variable <sup>b</sup> |          |          | Socio-economic variable <sup>c</sup> |            |         | AC <sup>d</sup> prevalence (%) |
|--------|-----------------|-------------------------------|------------|-----------|------------|-----------------------------------|----------|----------|--------------------------------------|------------|---------|--------------------------------|
|        |                 | Tmax (°C)                     | Tmean (°C) | Tmin (°C) | RHmean (%) | %4- (%)                           | %5-9 (%) | %65+ (%) | Savings (million yen)                | CPI (unit) | EPI (%) |                                |
| East   | Hokkaido        | 26.86                         | 8.82       | -9.33     | 66.67      | 5.56                              | 6.02     | 14.52    | 7.90                                 | 85.21      | 0.38    | 6.14                           |
| East   | Iwate           | 27.26                         | 10.20      | -6.76     | 73.84      | 1.39                              | 6.18     | 16.93    | 7.99                                 | 83.59      | 0.29    | 20.36                          |
| East   | Miyagi          | 28.80                         | 12.36      | -3.00     | 71.13      | 2.21                              | 6.21     | 14.01    | 8.25                                 | 84.72      | 0.51    | 33.43                          |
| East   | Aomori          | 27.57                         | 10.28      | -6.31     | 74.81      | 1.46                              | 6.39     | 15.39    | 6.71                                 | 80.67      | 0.30    | 18.90                          |
| East   | Fukushima       | 29.63                         | 12.97      | -2.99     | 68.91      | 2.05                              | 6.38     | 16.35    | 8.40                                 | 82.47      | 0.42    | 33.86                          |
| East   | Ibaraki         | 28.93                         | 13.62      | -0.72     | 74.47      | 2.76                              | 6.44     | 14.12    | 10.63                                | 83.18      | 0.60    | 53.20                          |
| East   | Yamagata        | 28.93                         | 11.67      | -4.73     | 74.48      | 1.23                              | 5.87     | 18.26    | 8.22                                 | 83.51      | 0.31    | 38.91                          |
| East   | Chiba           | 29.58                         | 15.67      | -1.36     | 68.68      | 5.34                              | 6.44     | 12.08    | 10.97                                | 85.10      | 0.72    | 63.12                          |
| East   | Akita           | 29.17                         | 11.65      | -4.58     | 73.09      | 1.20                              | 5.66     | 18.27    | 7.42                                 | 84.23      | 0.27    | 30.72                          |
| East   | Tochigi         | 29.00                         | 13.71      | -1.43     | 69.85      | 1.89                              | 6.39     | 14.26    | 11.06                                | 82.76      | 0.58    | 54.73                          |
| East   | Tokyo           | 30.72                         | 16.19      | 1.72      | 62.07      | 12.06                             | 5.14     | 12.65    | 12.88                                | 85.96      | 1.21    | 74.09                          |
| East   | Saitama         | 30.46                         | 14.89      | -0.02     | 65.68      | 6.19                              | 6.63     | 11.03    | 10.53                                | 84.07      | 0.70    | 72.88                          |
| East   | Kanagawa        | 29.42                         | 15.74      | -1.58     | 67.15      | 7.80                              | 6.12     | 11.36    | 12.39                                | 84.38      | 0.89    | 65.44                          |
| East   | Gunma           | 30.28                         | 14.49      | -0.80     | 63.54      | 1.93                              | 6.32     | 15.14    | 10.63                                | 85.17      | 0.55    | 58.94                          |
| East   | Niigata         | 30.40                         | 13.76      | -1.52     | 71.77      | 2.43                              | 6.01     | 17.24    | 9.97                                 | 83.99      | 0.40    | 57.84                          |
| East   | Yamanashi       | 29.31                         | 14.54      | -1.27     | 65.30      | 0.84                              | 6.15     | 16.59    | 9.79                                 | 83.21      | 0.38    | 42.05                          |
| East   | Shizuoka        | 29.91                         | 16.55      | 2.22      | 67.76      | 3.60                              | 6.34     | 14.58    | 11.17                                | 83.46      | 0.70    | 58.08                          |
| East   | Nagano          | 28.58                         | 11.88      | -5.01     | 72.12      | 2.13                              | 6.09     | 17.85    | 10.63                                | 84.68      | 0.44    | 27.96                          |
| East   | Toyama          | 30.70                         | 13.98      | -2.11     | 77.35      | 1.10                              | 5.91     | 17.08    | 11.28                                | 85.02      | 0.42    | 62.83                          |
| East   | Aichi           | 30.46                         | 15.70      | -0.23     | 66.69      | 6.68                              | 6.46     | 12.07    | 12.45                                | 84.68      | 0.97    | 73.91                          |
| East   | Gifu            | 30.77                         | 15.74      | -0.42     | 67.30      | 2.02                              | 6.35     | 15.10    | 11.78                                | 84.52      | 0.49    | 61.70                          |
| East   | Ishikawa        | 30.50                         | 14.59      | -1.16     | 71.95      | 1.14                              | 6.22     | 15.65    | 11.97                                | 85.95      | 0.44    | 62.88                          |
| West   | Mie             | 30.61                         | 15.79      | 0.59      | 69.00      | 1.77                              | 6.20     | 15.91    | 11.82                                | 82.06      | 0.54    | 68.16                          |
| East   | Fukui           | 30.56                         | 14.51      | -1.02     | 75.11      | 0.81                              | 6.25     | 16.87    | 12.80                                | 85.25      | 0.38    | 67.39                          |
| West   | Shiga           | 29.54                         | 14.63      | -0.77     | 74.18      | 1.22                              | 6.65     | 13.95    | 11.95                                | 84.20      | 0.53    | 67.06                          |
| West   | Nara            | 29.44                         | 14.82      | -0.39     | 72.75      | 1.31                              | 6.25     | 14.42    | 12.46                                | 85.99      | 0.39    | 75.27                          |
| West   | Kyoto           | 30.68                         | 15.83      | -0.08     | 66.19      | 2.56                              | 5.85     | 14.93    | 11.06                                | 82.57      | 0.56    | 78.23                          |
| West   | Osaka           | 31.02                         | 16.78      | 1.35      | 63.63      | 8.62                              | 6.14     | 12.48    | 10.79                                | 84.57      | 0.75    | 82.62                          |
| West   | Hyogo           | 30.12                         | 16.25      | 0.17      | 66.45      | 5.34                              | 6.24     | 14.25    | 11.62                                | 85.37      | 0.55    | 73.09                          |
| West   | Wakayama        | 30.25                         | 16.57      | 1.51      | 66.37      | 1.06                              | 6.03     | 17.65    | 10.75                                | 84.38      | 0.30    | 69.89                          |
| West   | Tokushima       | 30.15                         | 16.46      | 0.81      | 66.84      | 0.81                              | 5.77     | 17.96    | 10.75                                | 84.97      | 0.31    | 65.83                          |
| West   | Tottori         | 30.44                         | 14.82      | -1.19     | 73.81      | 0.60                              | 6.04     | 18.09    | 10.54                                | 84.50      | 0.25    | 59.16                          |
| West   | Kagawa          | 30.52                         | 16.12      | 0.90      | 68.44      | 1.00                              | 5.95     | 17.42    | 12.55                                | 84.38      | 0.43    | 74.12                          |

|      |           |       |       |       |       |      |      |       |       |       |      |       |
|------|-----------|-------|-------|-------|-------|------|------|-------|-------|-------|------|-------|
| West | Okayama   | 30.54 | 15.85 | -0.21 | 68.36 | 1.90 | 6.08 | 16.99 | 11.55 | 83.97 | 0.48 | 70.85 |
| West | Kochi     | 29.66 | 16.87 | 1.13  | 68.47 | 0.81 | 5.67 | 19.53 | 9.53  | 84.71 | 0.23 | 57.90 |
| West | Shimane   | 29.73 | 14.81 | -1.08 | 75.88 | 0.76 | 5.87 | 20.23 | 9.66  | 82.93 | 0.23 | 56.21 |
| West | Ehime     | 30.16 | 16.32 | 0.75  | 66.60 | 1.48 | 6.08 | 17.62 | 9.70  | 84.44 | 0.37 | 61.71 |
| West | Hiroshima | 30.10 | 15.88 | -0.42 | 69.40 | 2.80 | 6.19 | 15.47 | 10.77 | 84.89 | 0.54 | 69.27 |
| West | Oita      | 29.98 | 16.31 | 0.93  | 70.03 | 1.21 | 6.06 | 17.76 | 8.13  | 84.55 | 0.33 | 56.01 |
| West | Yamaguchi | 29.40 | 15.30 | -1.13 | 73.61 | 1.54 | 5.88 | 18.13 | 9.96  | 86.46 | 0.41 | 61.49 |
| West | Miyazaki  | 30.37 | 17.49 | 2.22  | 73.72 | 1.14 | 6.53 | 16.69 | 6.75  | 85.05 | 0.29 | 54.65 |
| West | Kumamoto  | 30.39 | 16.79 | 0.11  | 70.79 | 1.81 | 6.18 | 17.47 | 7.65  | 84.44 | 0.36 | 60.83 |
| West | Kagoshima | 30.24 | 18.30 | 2.14  | 70.59 | 1.76 | 6.29 | 18.48 | 6.66  | 83.23 | 0.29 | 53.38 |
| West | Fukuoka   | 30.75 | 16.85 | 0.97  | 68.09 | 4.77 | 6.16 | 14.40 | 8.60  | 85.08 | 0.58 | 69.69 |
| West | Saga      | 30.21 | 16.49 | 0.19  | 70.81 | 0.86 | 6.49 | 16.97 | 8.44  | 85.73 | 0.31 | 65.87 |
| West | Nagasaki  | 30.17 | 17.09 | 1.01  | 70.51 | 1.53 | 6.54 | 16.83 | 7.36  | 83.56 | 0.27 | 59.16 |
| West | Okinawa   | 29.89 | 22.91 | 11.84 | 74.42 | 1.24 | 8.11 | 11.89 | 4.09  | 91.12 | 0.28 | 59.88 |

<sup>a</sup> Climate variables for 1972–2012 (annual values, N = 41): Tmax (maximum daily mean temperature), Tmean (average daily mean temperature), Tmin (minimum daily mean temperature) and RHmean (average daily mean relative humidity)

<sup>b</sup> Demographic variables for 1972–2012 (annual values, N = 41): Percent of population  $\leq 4$ , 5–9, and  $\geq 65$  years of age.

<sup>c</sup> Socio-economic variables: Savings (annual average savings per household with two or more persons, available every 5 years from 1974–2009, N = 8), EPI (economic power index, a measure of financial strength of a local government, higher value represents more strength, 2003-2010, N = 8), CPI (consumer price index, measure of the cost of goods and services by household, 1972-2012, N = 41)

<sup>d</sup> Air conditioning prevalence for households with two or more persons, 1972-2009 (N = 38)

**Table S3. Association between each aspect (MMT, heat- and cold-related mortality risks) and each meta-variable in female mortality**

| Meta-variable                       | MMT                                   |         | Heat-related RR                       |         | Cold-related RR                       |         |
|-------------------------------------|---------------------------------------|---------|---------------------------------------|---------|---------------------------------------|---------|
|                                     | Slope estimate <sup>a</sup><br>95% CI | p-value | Slope estimate <sup>a</sup><br>95% CI | p-value | Slope estimate <sup>a</sup><br>95% CI | p-value |
| <b>Climate<sup>b</sup></b>          |                                       |         |                                       |         |                                       |         |
| Tmax                                | 0.0019 ( -0.0026 , 0.0064 )           | 0.4096  | -0.0002 ( -0.0006 , 0.0002 )          | 0.3278  | -0.0001 ( -0.0003 , 0.0001 )          | 0.2552  |
| Tmean                               | 0.0073 ( -0.0023 , 0.0168 )           | 0.1372  | -0.0014 ( -0.0022 , -0.0006 )         | 0.0003* | -0.0001 ( -0.0005 , 0.0002 )          | 0.4829  |
| Tmin                                | 0.0035 ( -0.0003 , 0.0073 )           | 0.0707  | 0 ( -0.0003 , 0.0003 )                | 0.8523  | 0.0002 ( 0 , 0.0003 )                 | 0.0362  |
| RHmean                              | -0.0004 ( -0.0037 , 0.0029 )          | 0.8096  | 0 ( -0.0003 , 0.0003 )                | 0.9343  | 0.0002 ( 0.0001 , 0.0003 )            | 0.0076* |
| <b>Demographic<sup>c</sup></b>      |                                       |         |                                       |         |                                       |         |
| % ≤ 4 years                         | -7.4769 ( -12.7499 , -2.2039 )        | 0.0055* | -1.0545 ( -1.3764 , -0.7325 )         | 0.0000* | 0.0179 ( -0.1535 , 0.1893 )           | 0.8375  |
| % 5–9 years                         | -2.8498 ( -7.5558 , 1.8562 )          | 0.2351  | -0.4513 ( -0.7767 , -0.1259 )         | 0.0066* | -0.3399 ( -0.4932 , -0.1865 )         | 0.0000* |
| % ≥ 65 years                        | -2.2754 ( -6.6394 , 2.0887 )          | 0.3066  | -0.2466 ( -0.57 , 0.0768 )            | 0.1350  | 0.3206 ( 0.1099 , 0.5313 )            | 0.0029* |
| <b>Socio-economic<sup>d</sup></b>   |                                       |         |                                       |         |                                       |         |
| Savings                             | 0.125 ( 0.0757 , 0.1744 )             | 0.0000* | 0.0007 ( -0.0026 , 0.004 )            | 0.6675  | -0.0034 ( -0.006 , -0.0008 )          | 0.0103  |
| EPI                                 | 2.3067 ( 0.7698 , 3.8436 )            | 0.0036* | -0.0115 ( -0.0332 , 0.0102 )          | 0.3002  | -0.0694 ( -0.101 , -0.0378 )          | 0.0000* |
| CPI                                 | -0.0002 ( -0.0049 , 0.0045 )          | 0.9308  | -0.0003 ( -0.0007 , 0 )               | 0.0373* | -0.0001 ( -0.0002 , 0.0001 )          | 0.4256  |
| <b>Air conditioning<sup>e</sup></b> |                                       |         |                                       |         |                                       |         |
| AC                                  | -0.0007 ( -0.0026 , 0.0012 )          | 0.4715  | 0.0001 ( 0 , 0.0002 )                 | 0.1937  | 0 ( -0.0001 , 0 )                     | 0.1369  |

<sup>a</sup> Change in each outcome [MMT in °C, heat- and cold-related mortality ln(RR)] per 1-unit increase in each meta-variable. Each meta-variable is scaled such that the slope estimate is not a value very close to zero.

<sup>b</sup> Climate variables for 1972–2012 (annual values, N = 41): Tmax (maximum daily mean temperature), Tmean (average daily mean temperature), Tmin (minimum daily mean temperature) and RHmean (average daily mean relative humidity)

<sup>c</sup> Demographic variables for 1972–2012 (annual values, N = 41): Percent of population ≤ 4, 5–9, and ≥ 65 years of age.

<sup>d</sup> Socio-economic variables: Savings (annual average savings per household with two or more persons, available every 5 years from 1974–2009, N = 8), EPI (economic power index, a measure of financial strength of a local government, higher value represents more strength, 2003-2010, N =8), CPI (consumer price index, measure of the cost of goods and services by household, 1972-2012, N = 41)

<sup>e</sup> Air conditioning prevalence for households with two or more persons, 1972-2009 (N = 38)

\* p-value<0.01

**Table S4. Association between each aspect (MMT, heat- and cold-related mortality risks) and each meta-variable in male mortality**

| Meta-variable                       | MMT                                   |         | Heat-related RR                       |         | Cold-related RR                       |         |
|-------------------------------------|---------------------------------------|---------|---------------------------------------|---------|---------------------------------------|---------|
|                                     | Slope estimate <sup>a</sup><br>95% CI | p-value | Slope estimate <sup>a</sup><br>95% CI | p-value | Slope estimate <sup>a</sup><br>95% CI | p-value |
| <b>Climate<sup>b</sup></b>          |                                       |         |                                       |         |                                       |         |
| Tmax                                | -0.0035 ( -0.007 , 0.0001 )           | 0.0548  | -0.0002 ( -0.0004 , 0.0001 )          | 0.1717  | 0 ( -0.0001 , 0.0002 )                | 0.7145  |
| Tmean                               | 0.0054 ( -0.0021 , 0.0129 )           | 0.1603  | -0.0007 ( -0.0011 , -0.0002 )         | 0.0031* | 0 ( -0.0004 , 0.0004 )                | 0.9864  |
| Tmin                                | 0.0036 ( 0.0007 , 0.0066 )            | 0.0166  | 0.0001 ( -0.0001 , 0.0002 )           | 0.5426  | 0.0002 ( 0.0001 , 0.0004 )            | 0.0073* |
| RHmean                              | -0.0013 ( -0.0038 , 0.0012 )          | 0.3008  | 0 ( -0.0001 , 0.0002 )                | 0.5678  | -0.0001 ( -0.0003 , 0 )               | 0.0801  |
| <b>Demographic<sup>c</sup></b>      |                                       |         |                                       |         |                                       |         |
| % ≤ 4 years                         | -5.7032 ( -9.9732 , -1.4332 )         | 0.0089* | -0.463 ( -0.6654 , -0.2607 )          | 0.0000* | 0.6795 ( 0.5013 , 0.8577 )            | 0.0000* |
| % 5–9 years                         | -5.6055 ( -9.5031 , -1.7079 )         | 0.0048* | -0.0604 ( -0.2548 , 0.1341 )          | 0.5427  | 0.0367 ( -0.1264 , 0.1998 )           | 0.6590  |
| % ≥ 65 years                        | 7.6721 ( 4.5135 , 10.8308 )           | 0.0000* | -0.2366 ( -0.4799 , 0.0067 )          | 0.0567  | 0.3123 ( 0.1052 , 0.5195 )            | 0.0031* |
| <b>Socio-economic<sup>d</sup></b>   |                                       |         |                                       |         |                                       |         |
| Savings                             | 0.0049 ( -0.02 , 0.0297 )             | 0.6991  | 0.0002 ( -0.0019 , 0.0022 )           | 0.8851  | 0 ( -0.0018 , 0.0019 )                | 0.9876  |
| EPI                                 | -0.432 ( -1.2481 , 3.8413 )           | 0.3018  | -0.0163 ( -0.0328 , 0.0002 )          | 0.0543  | 0.0017 ( -0.0218 , 0.0253 )           | 0.8862  |
| CPI                                 | 0.0014 ( -0.0022 , 0.0051 )           | 0.4378  | -0.0001 ( -0.0003 , 0.0001 )          | 0.2797  | 0.0006 ( 0.0005 , 0.0008 )            | 0.0000* |
| <b>Air conditioning<sup>e</sup></b> |                                       |         |                                       |         |                                       |         |
| AC                                  | 0.0005 ( -0.0004 , 0.0015 )           | 0.2855  | 0.0001 ( 0 , 0.0001 )                 | 0.1428  | -0.0001 ( -0.0001 , 0 )               | 0.0727  |

<sup>a</sup> Change in each outcome [MMT in °C, heat- and cold-related mortality ln(RR)] per 1-unit increase in each meta-variable. Each meta-variable is scaled such that the slope estimate is not a value very close to zero.

<sup>b</sup> Climate variables for 1972–2012 (annual values, N = 41): Tmax (maximum daily mean temperature), Tmean (average daily mean temperature), Tmin (minimum daily mean temperature) and RHmean (average daily mean relative humidity)

<sup>c</sup> Demographic variables for 1972–2012 (annual values, N = 41): Percent of population ≤ 4, 5–9, and ≥ 65 years of age.

<sup>d</sup> Socio-economic variables: Savings (annual average savings per household with two or more persons, available every 5 years from 1974–2009, N = 8), EPI (economic power index, a measure of financial strength of a local government, higher value represents more strength, 2003-2010, N =8), CPI (consumer price index, measure of the cost of goods and services by household, 1972-2012, N = 41)

<sup>e</sup> Air conditioning prevalence for households with two or more persons, 1972-2009 (N = 38)

\* p-value<0.01



**Figure S2.** Time-series plot for each of the prefecture-specific meta-variables. Blue and red indicate the eastern and western prefectures, respectively.

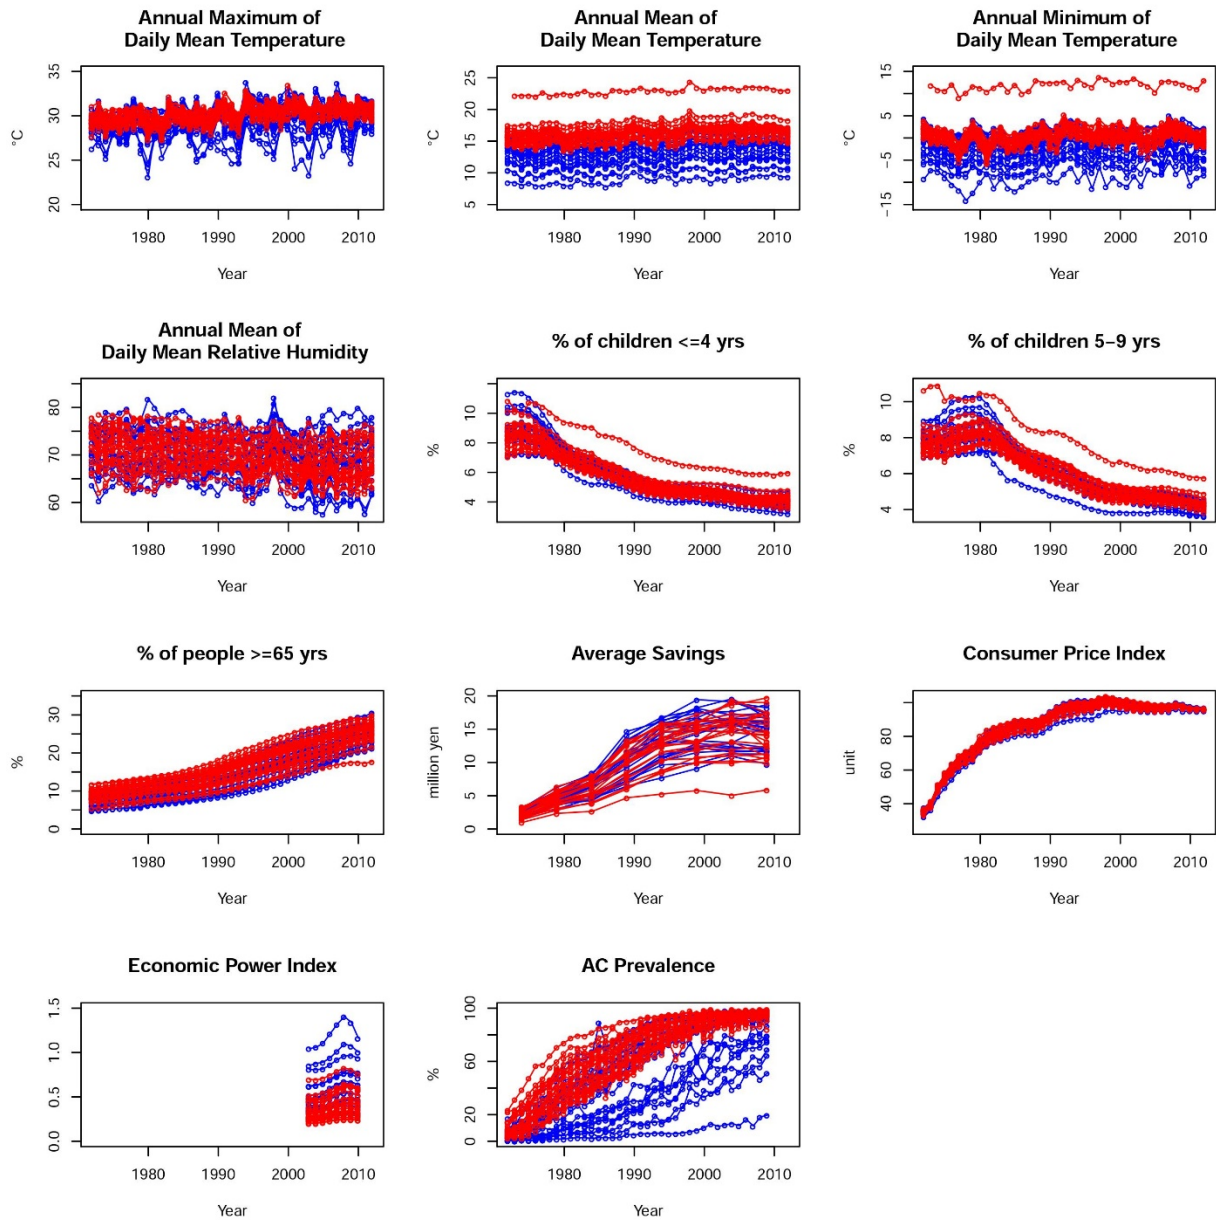

**Figure S3.** Prefecture-specific time-varying temperature distribution (minimum, 1<sup>st</sup>, 25<sup>th</sup>, 50<sup>th</sup>, 75<sup>th</sup>, 99<sup>th</sup> percentiles, and maximum). At each time point, a temperature distribution was defined using the daily mean temperatures for the 6-year moving period with the specific time point as a center.

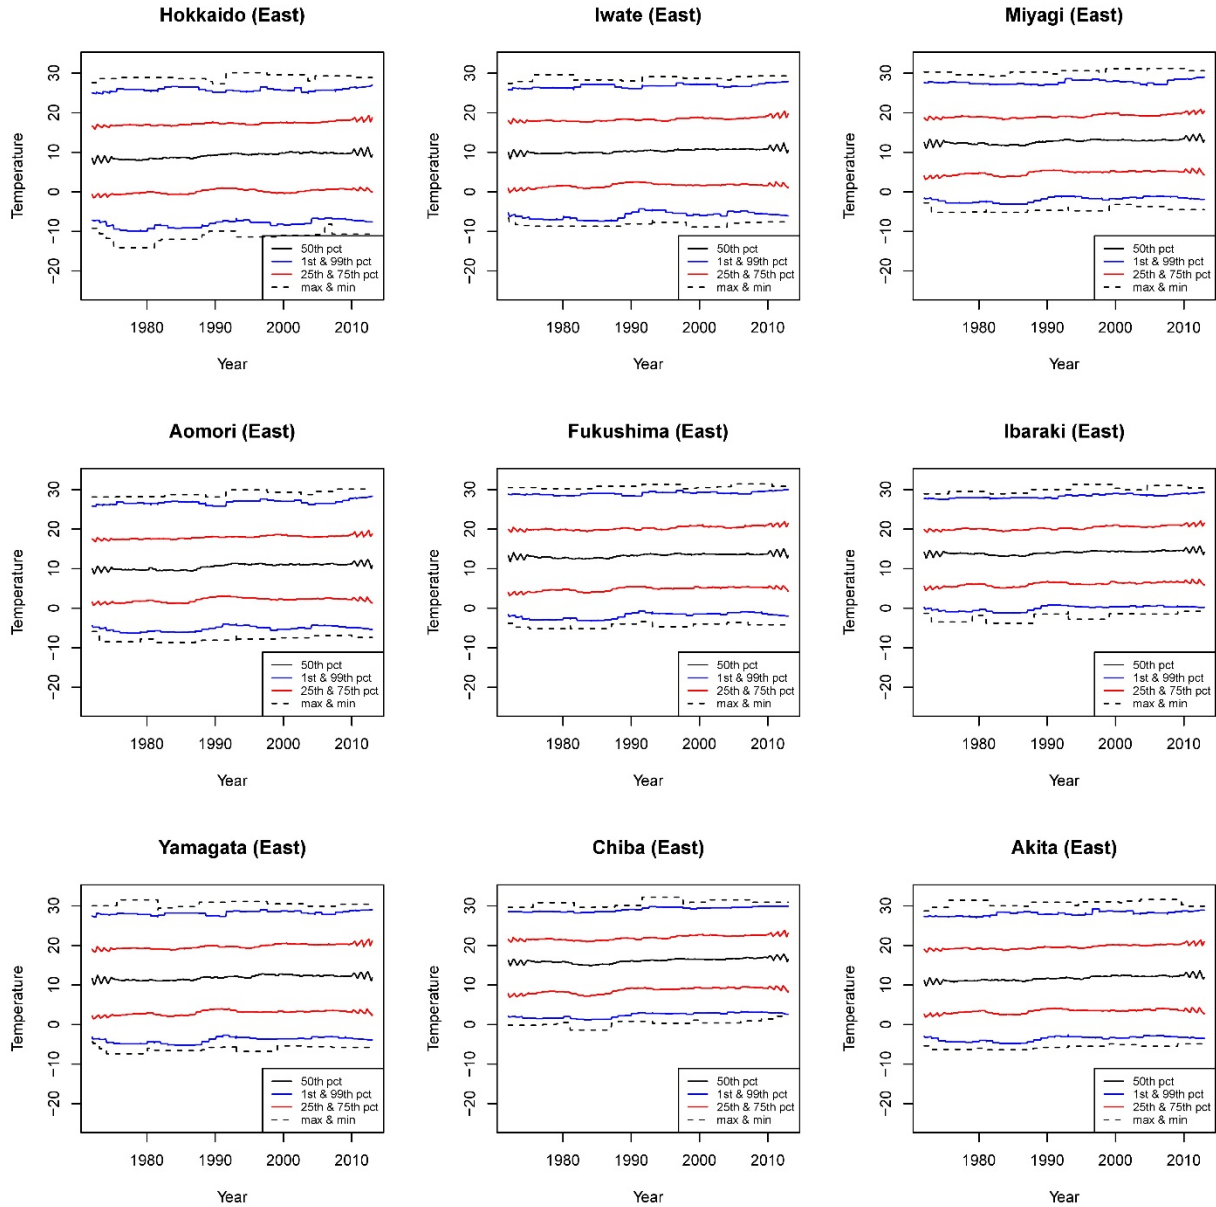











**Nagasaki (West)**

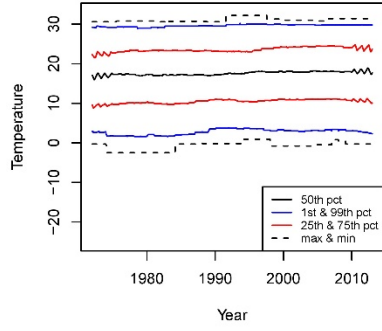

**Okinawa (West)**

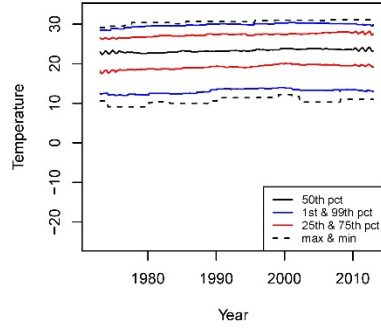

**Figure S4.** Region-specific time-varying minimum mortality temperature (MMT) together with the time-varying minimum mortality temperature percentile (MMTP) (top), time-varying heat-related mortality risk (middle), and time-varying cold-related mortality risk (bottom). Black solid and dashed lines indicate the point estimate of the MMT and 95% point-wise confidence intervals, respectively. Blue line in the top panels indicates the MMTP.

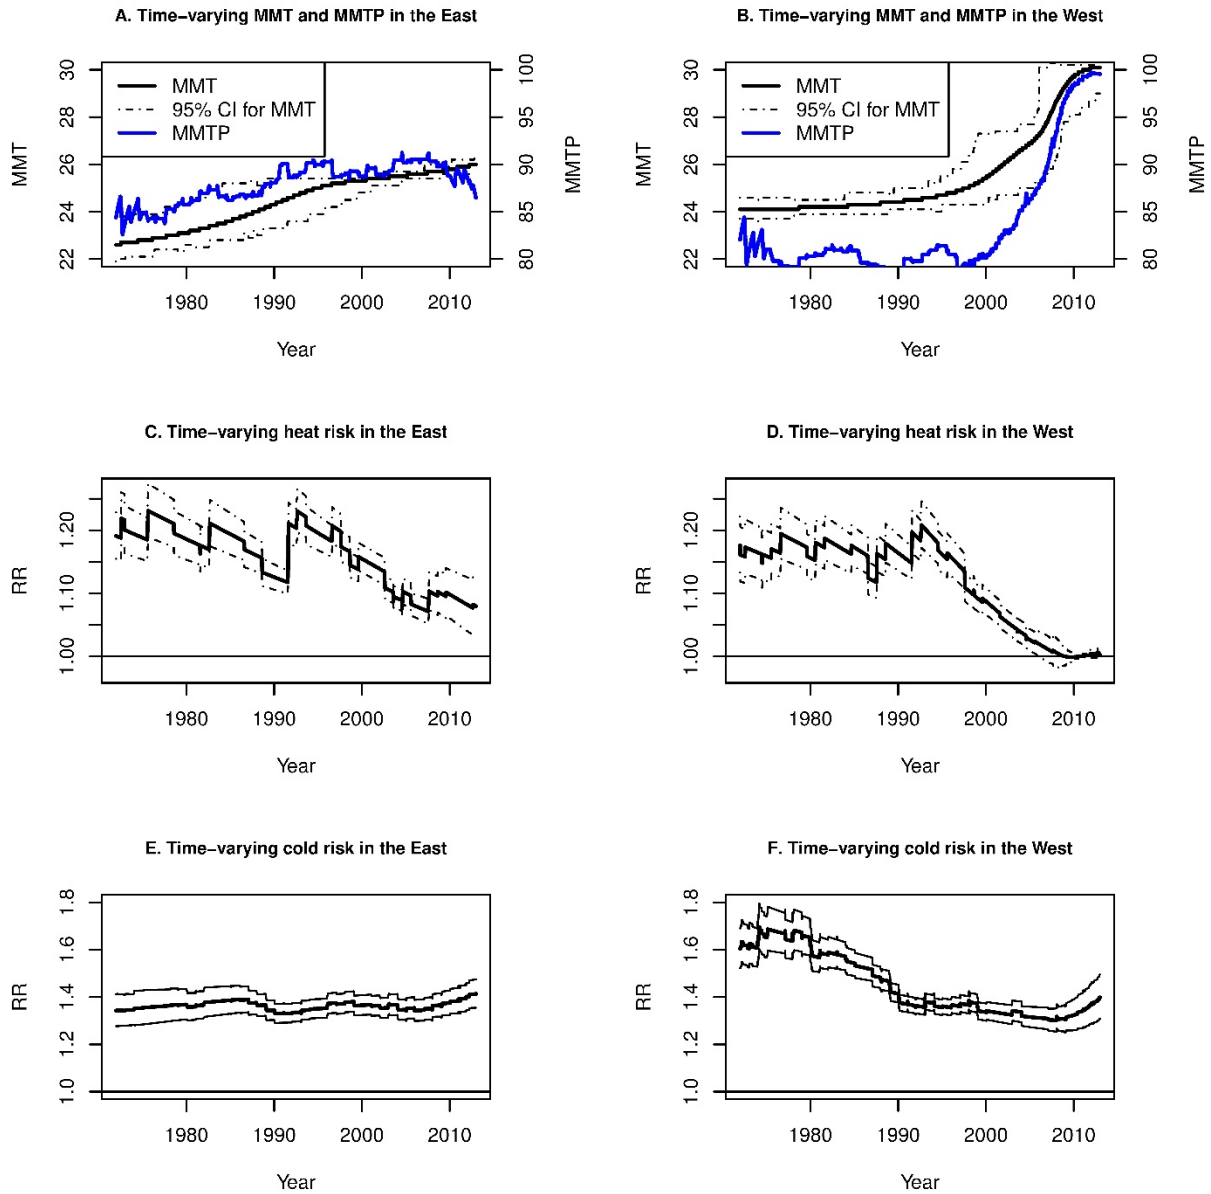

**Figure S5.** Prefecture-specific time-varying minimum mortality temperature (MMT) and minimum mortality temperature percentile (MMTP). Black solid and dashed lines indicate the point estimate of the MMT and 95% point-wise confidence intervals, respectively. Blue line indicates the MMTP.

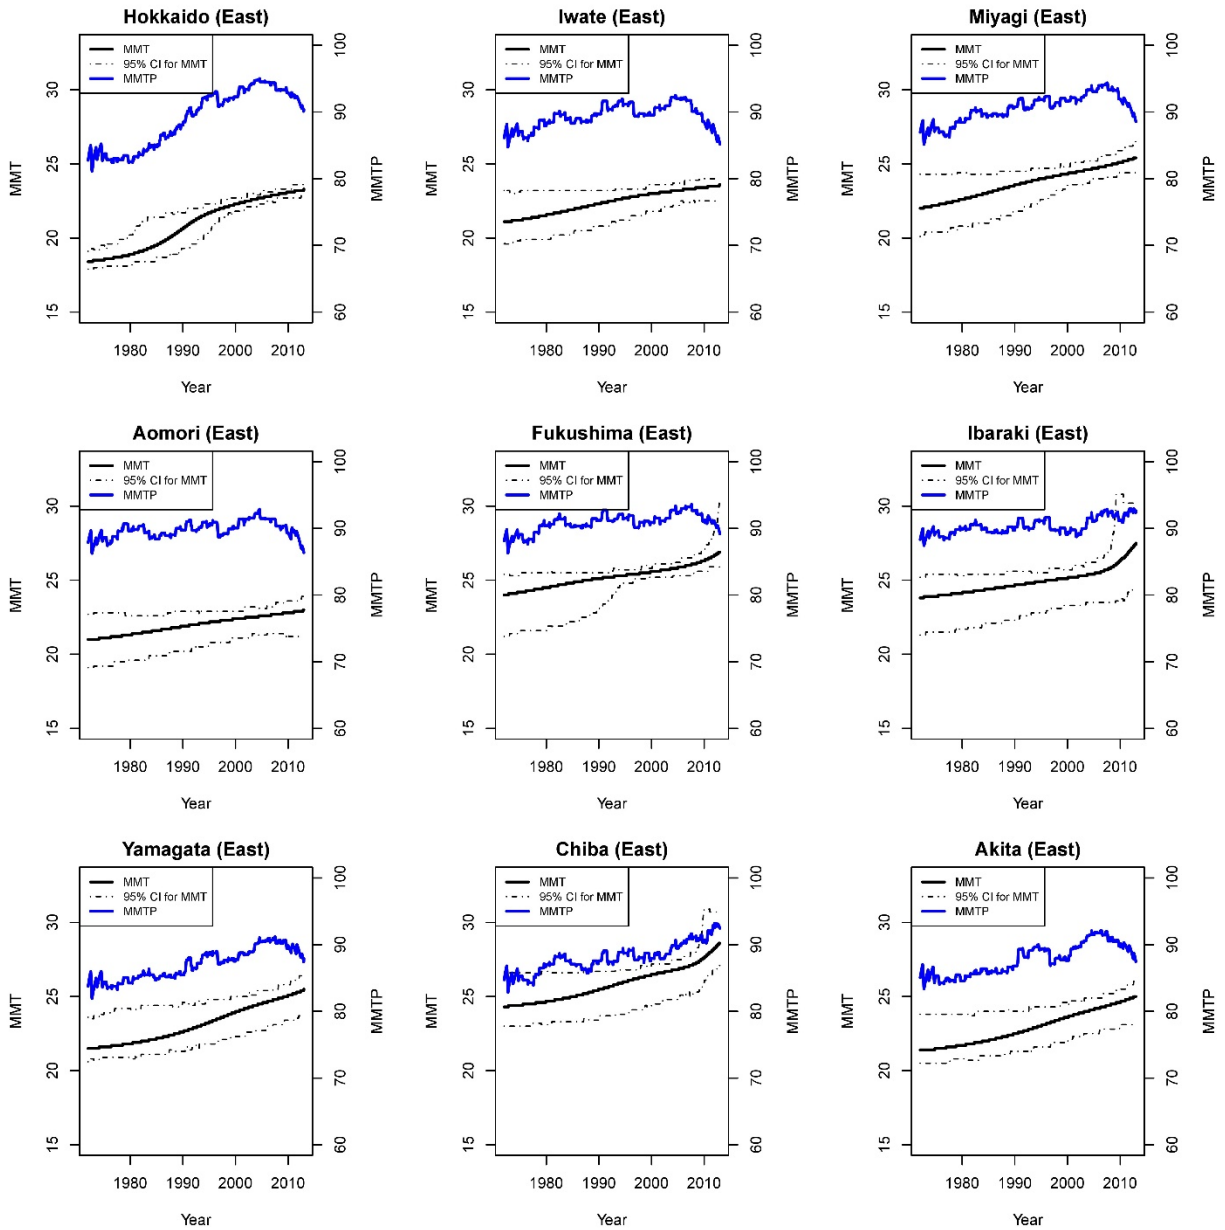

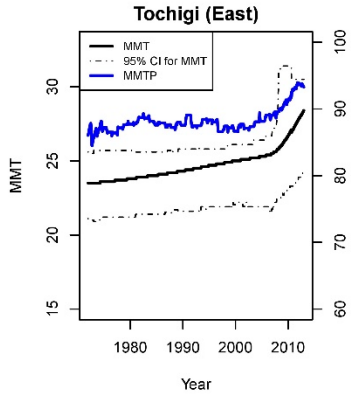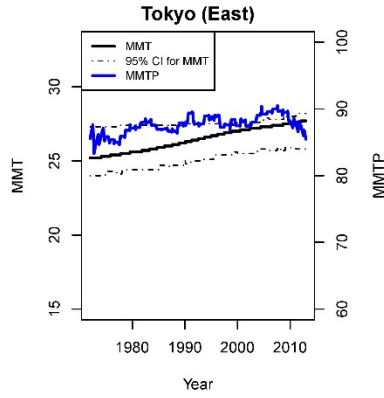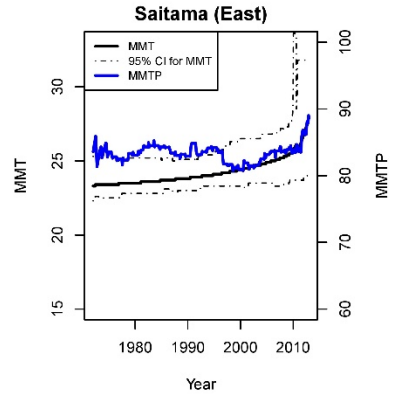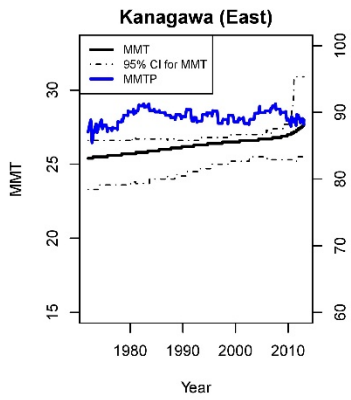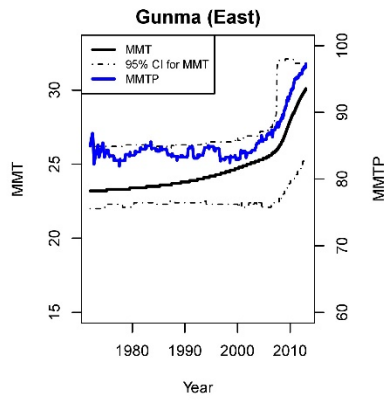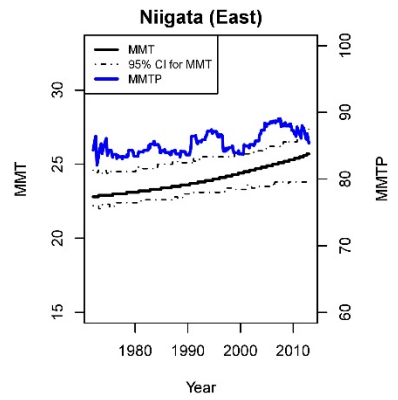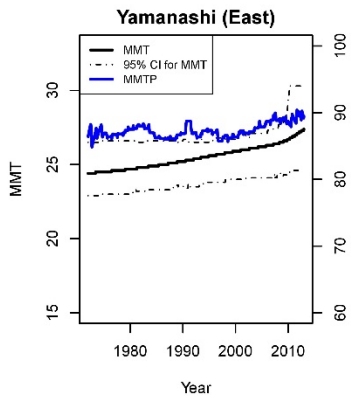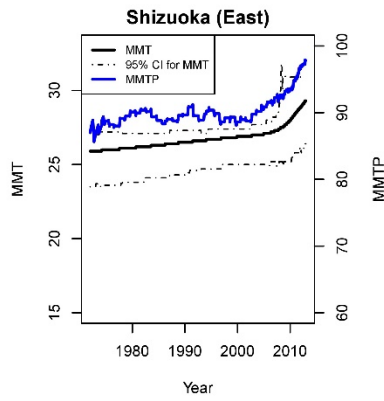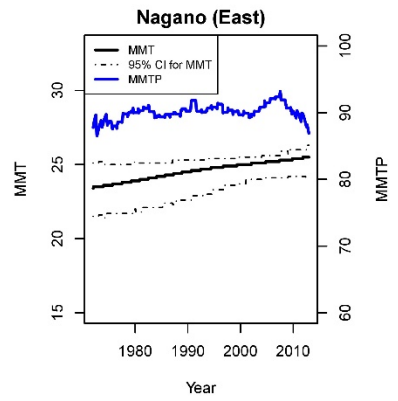

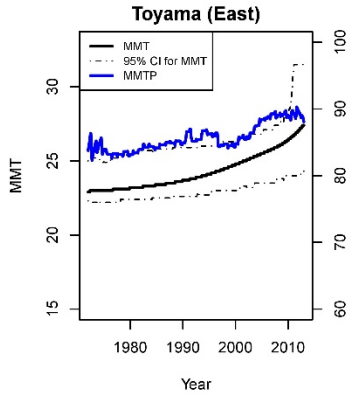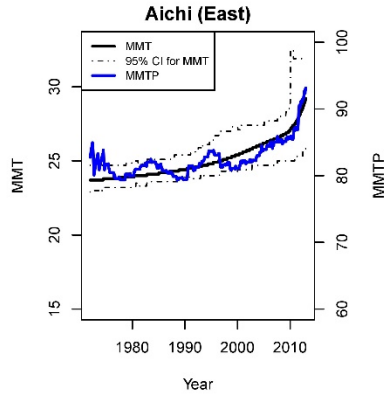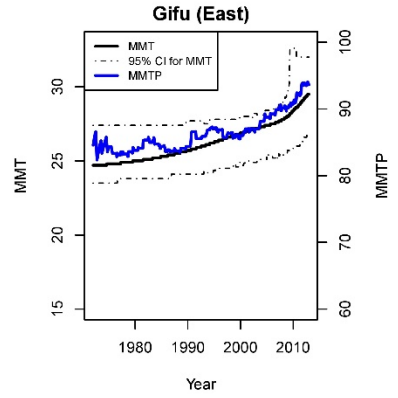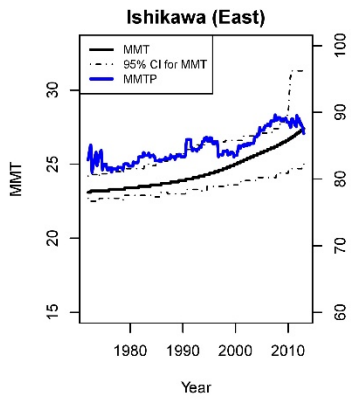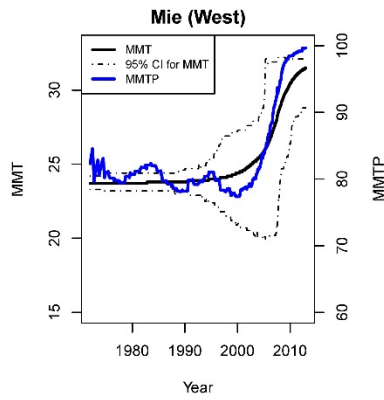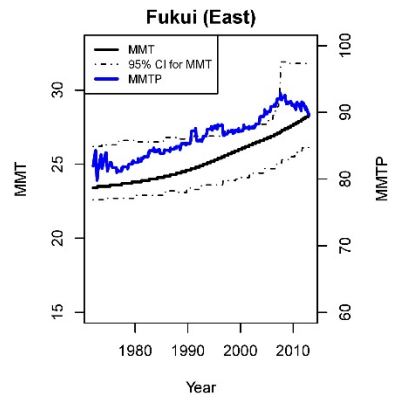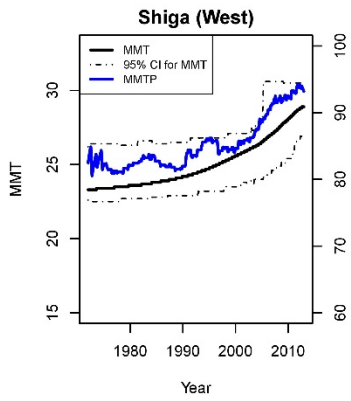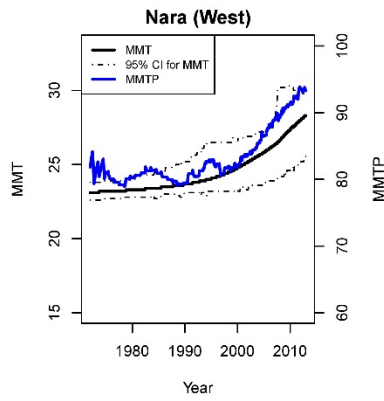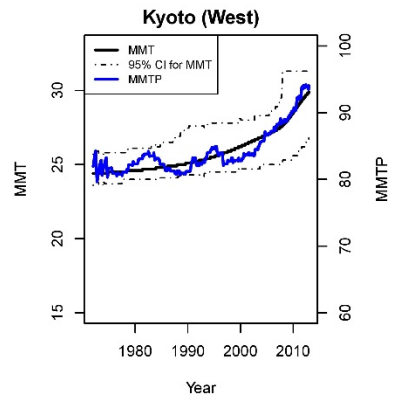



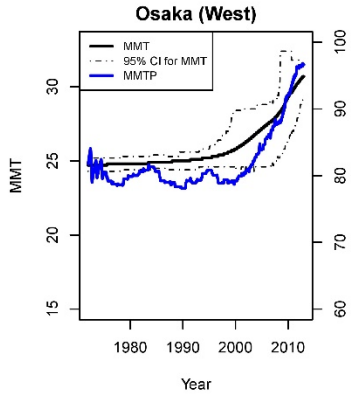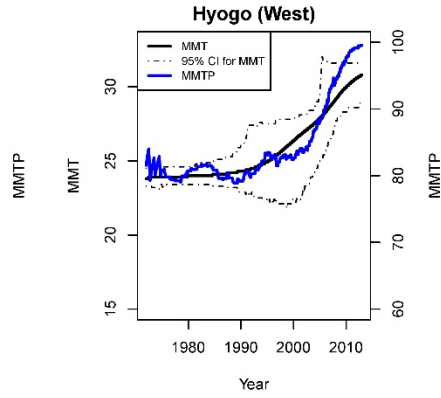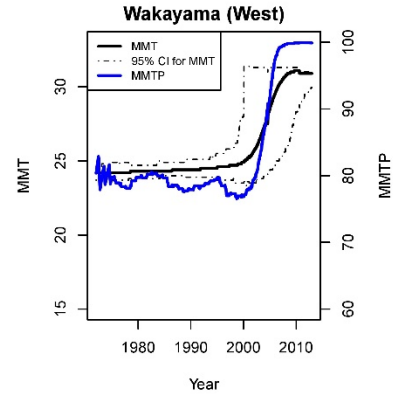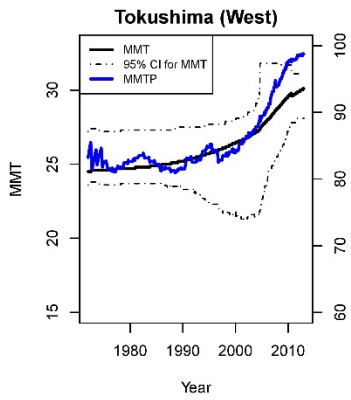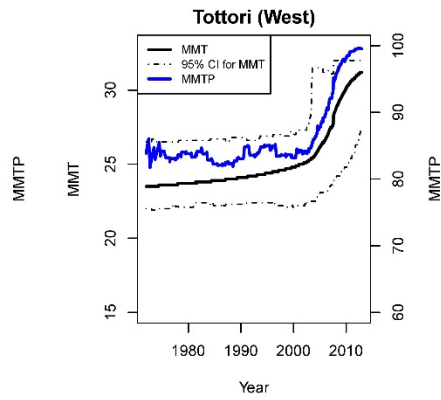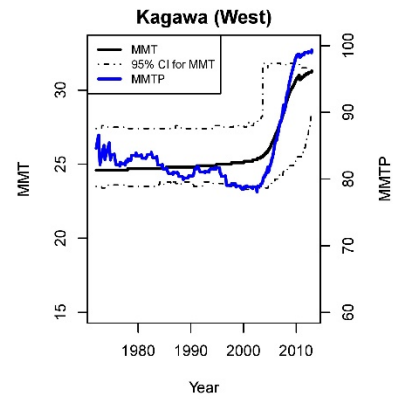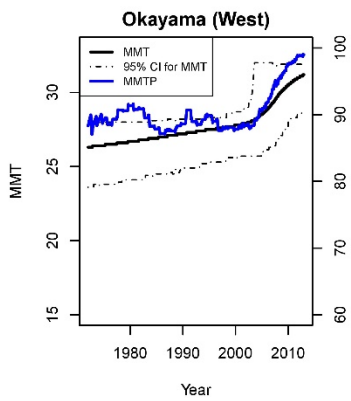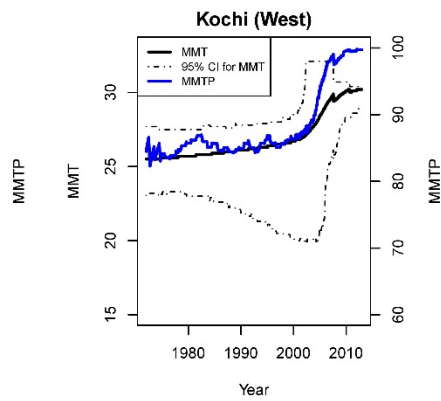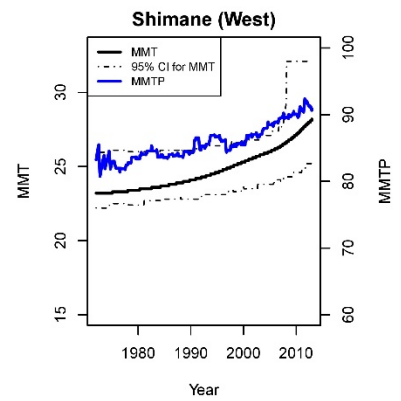

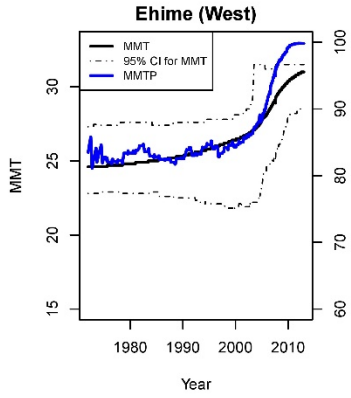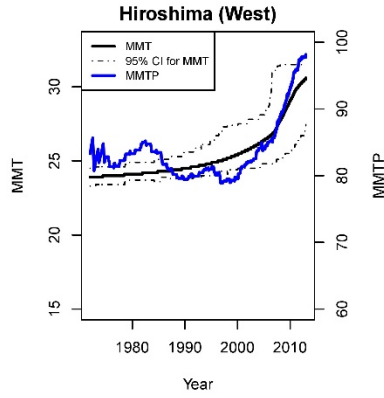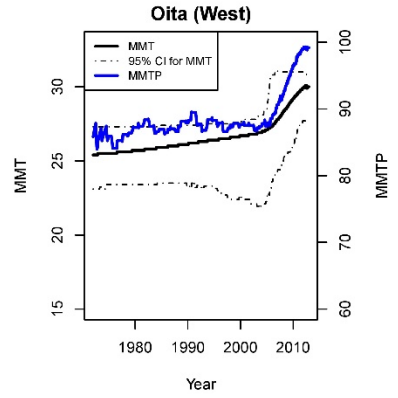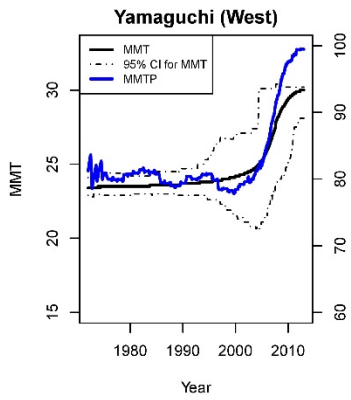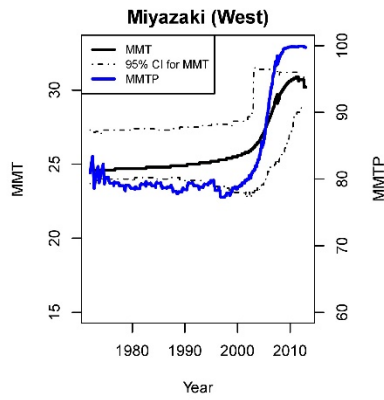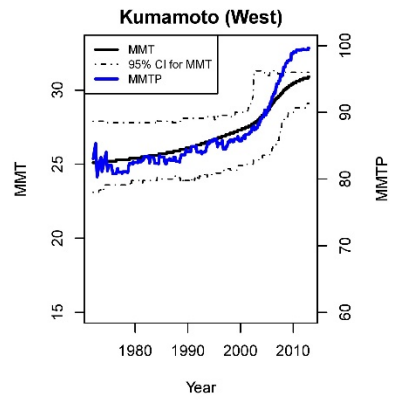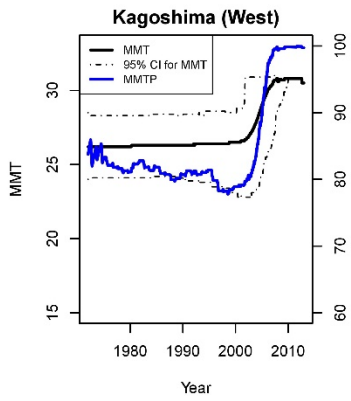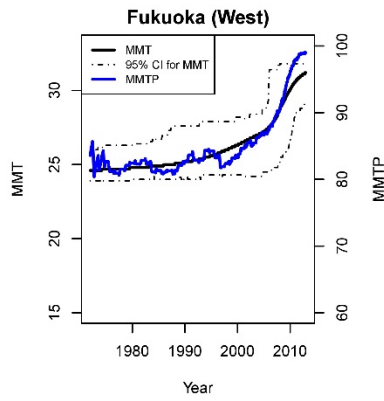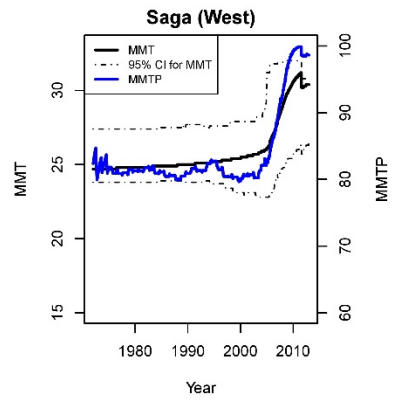

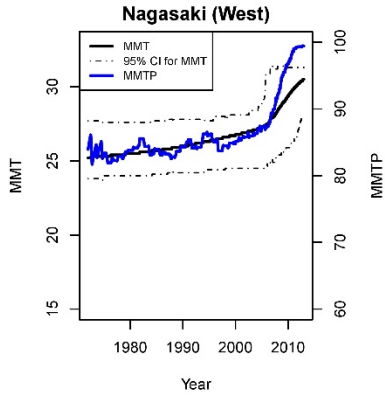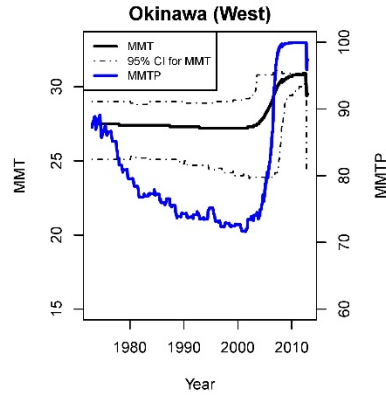

**Figure S6.** Prefecture-specific time-varying heat-related mortality risk. The heat-related risk was defined as the relative risk comparing the time-varying minimum mortality temperature (MMT) and the time-varying 99<sup>th</sup> temperature percentile. Black solid and dashed lines indicate the point estimate of the heat risk and 95% point-wise confidence intervals, respectively.

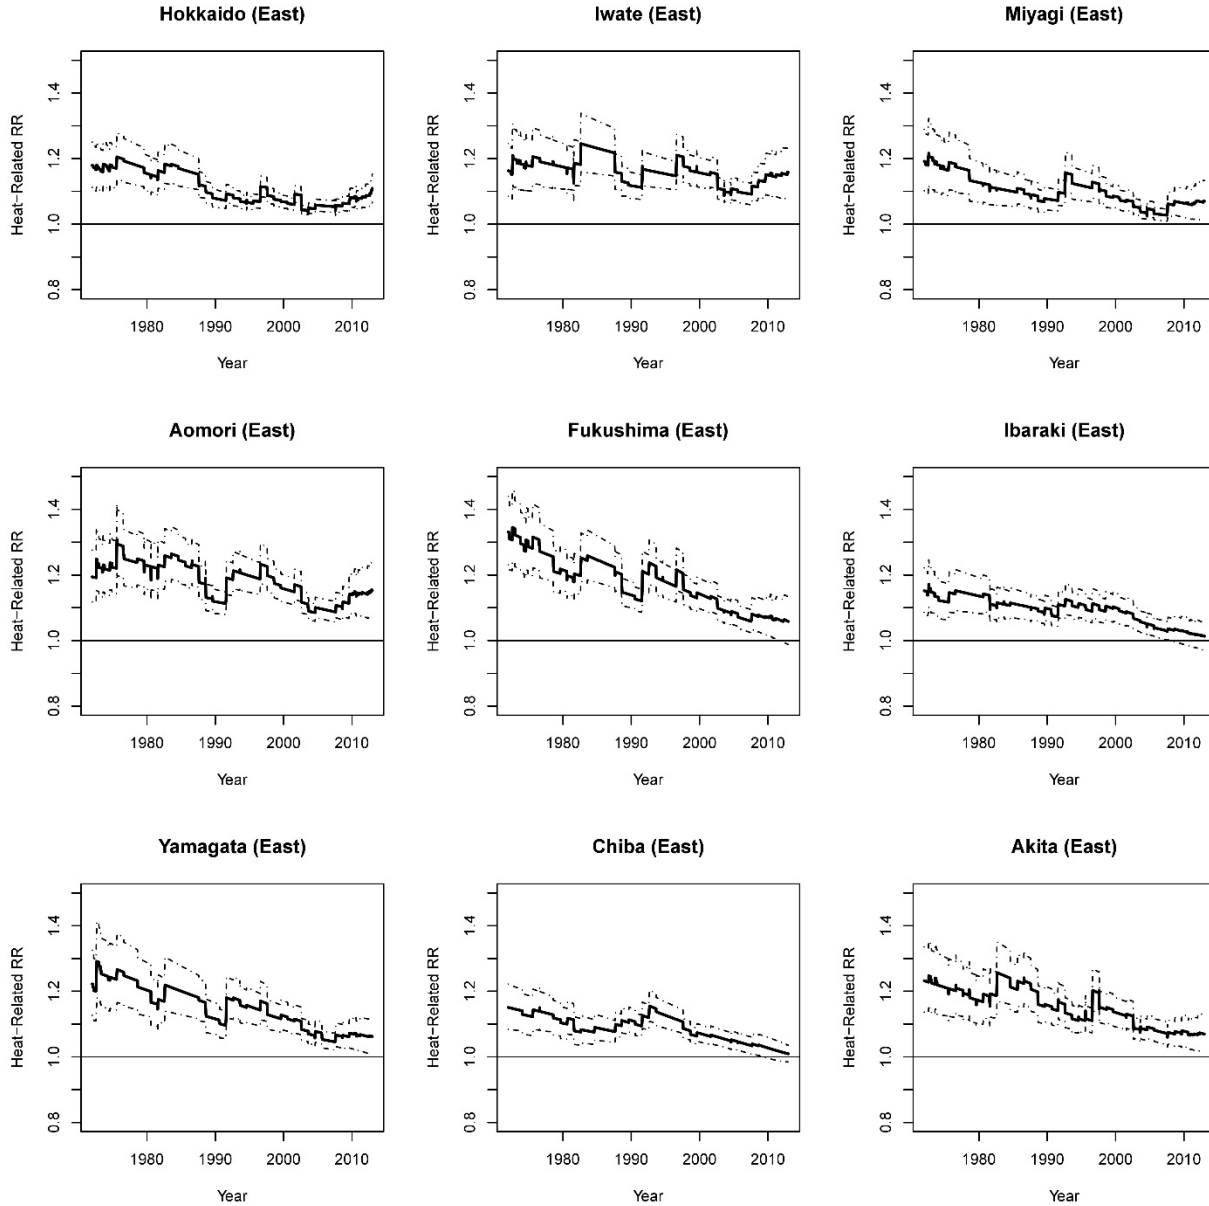

**Tochigi (East)**

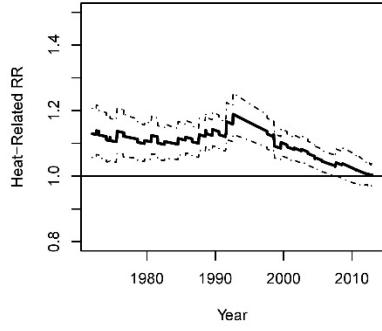

**Tokyo (East)**

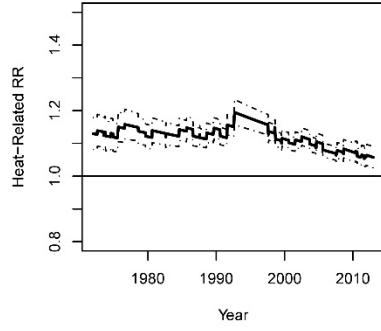

**Saitama (East)**

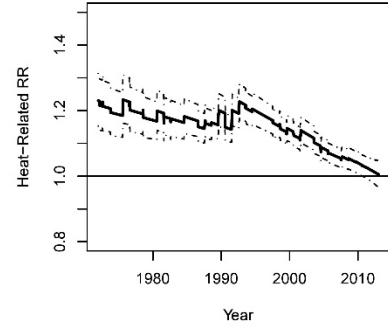

**Kanagawa (East)**

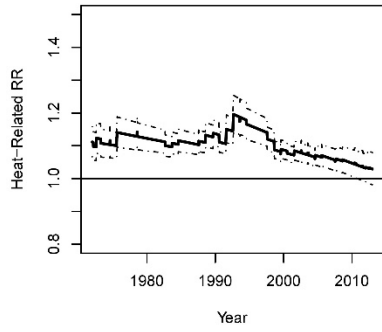

**Gunma (East)**

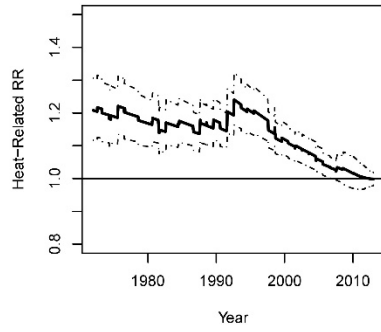

**Niigata (East)**

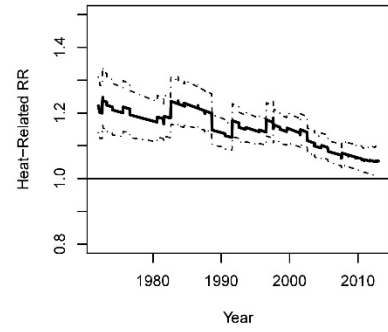

**Yamanashi (East)**

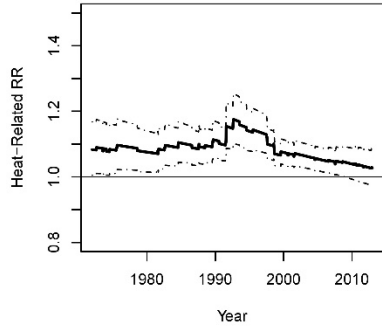

**Shizuoka (East)**

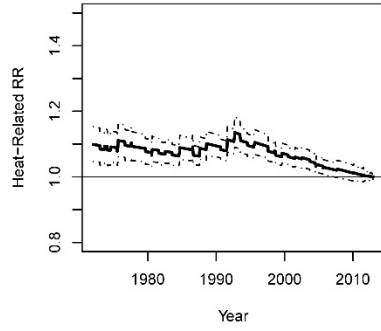

**Nagano (East)**

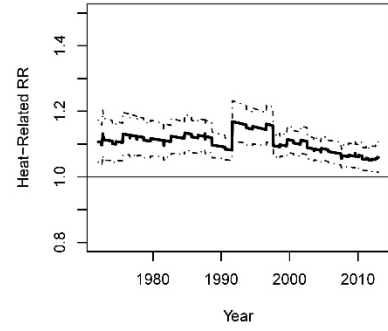

**Toyama (East)**

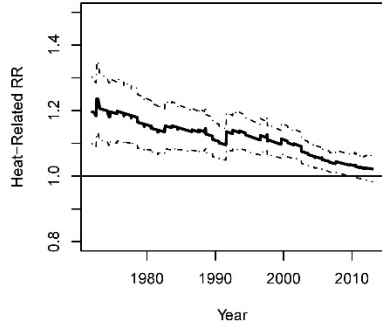

**Aichi (East)**

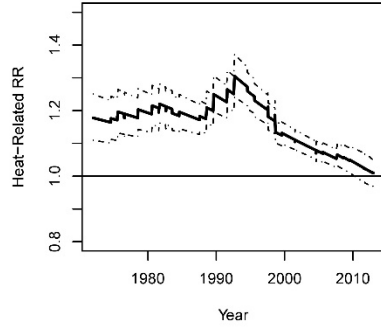

**Gifu (East)**

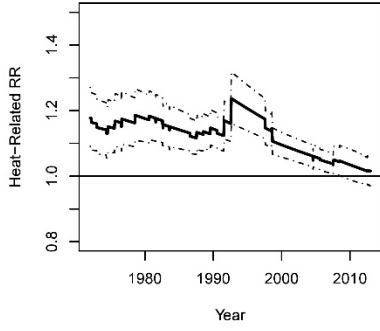

**Ishikawa (East)**

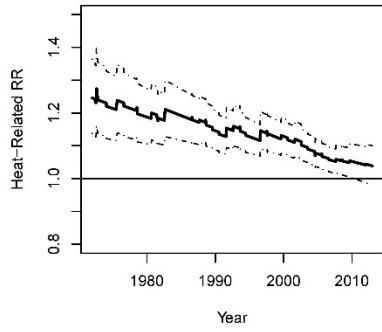

**Mie (West)**

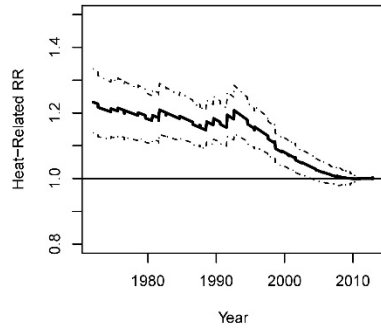

**Fukui (East)**

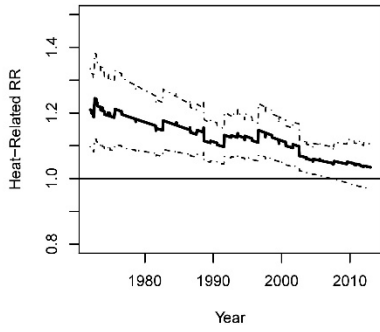

**Shiga (West)**

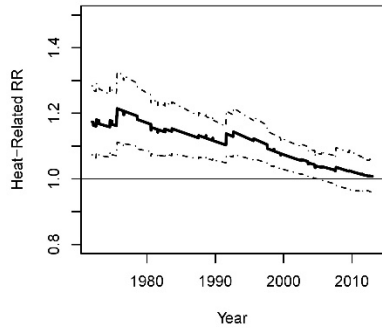

**Nara (West)**

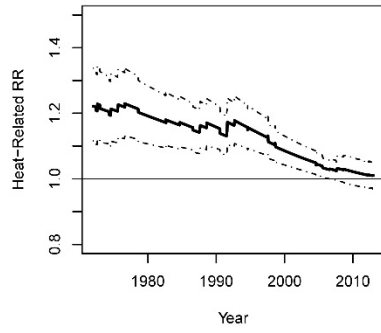

**Kyoto (West)**

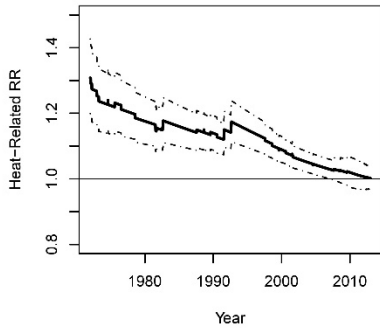

**Osaka (West)**

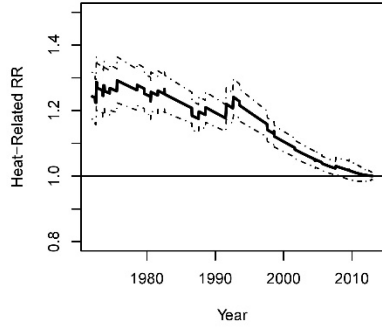

**Hyogo (West)**

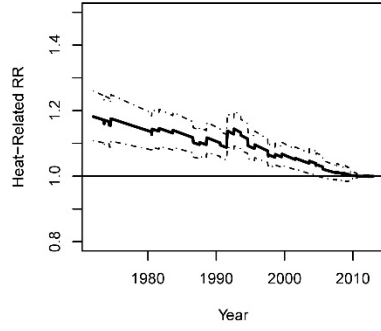

**Wakayama (West)**

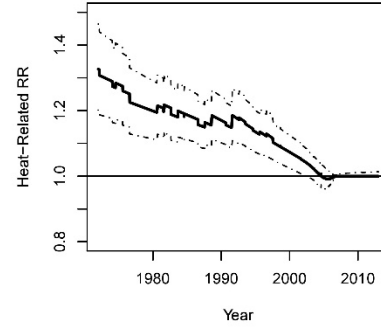

**Tokushima (West)**

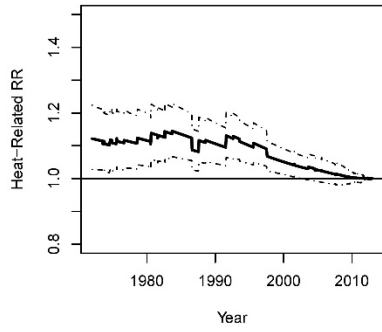

**Tottori (West)**

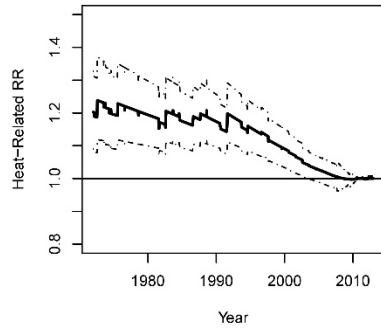

**Kagawa (West)**

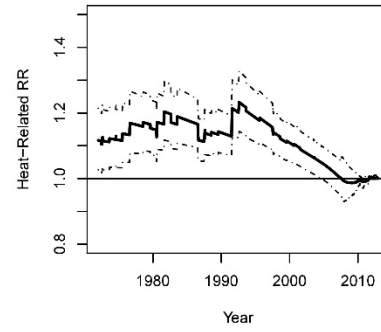

**Okayama (West)**

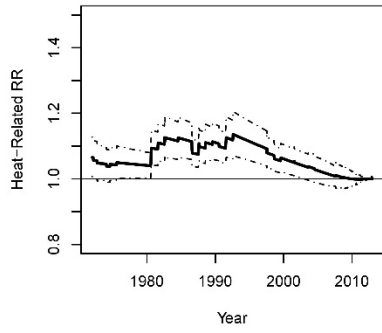

**Kochi (West)**

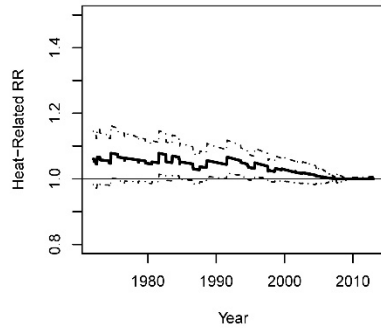

**Shimane (West)**

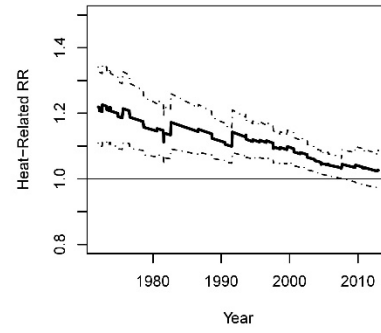

**Ehime (West)**

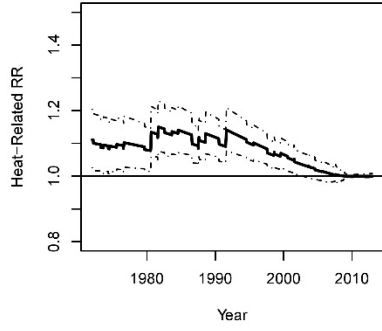

**Hiroshima (West)**

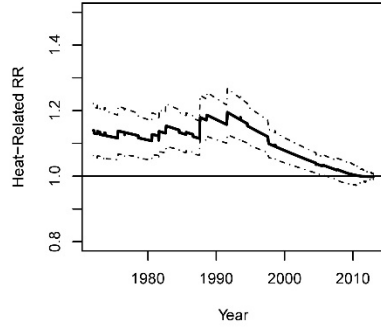

**Oita (West)**

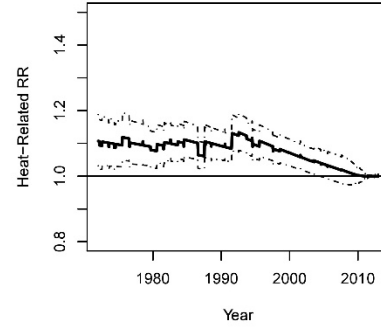

**Yamaguchi (West)**

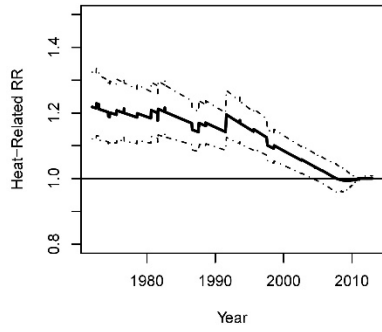

**Miyazaki (West)**

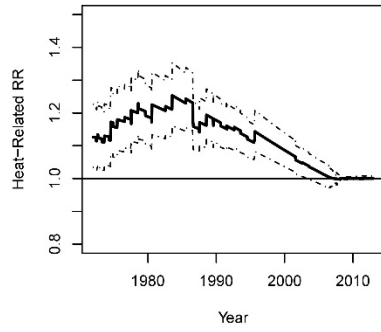

**Kumamoto (West)**

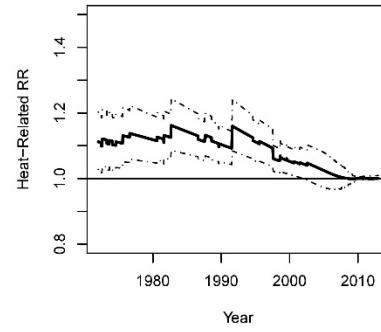

**Kagoshima (West)**

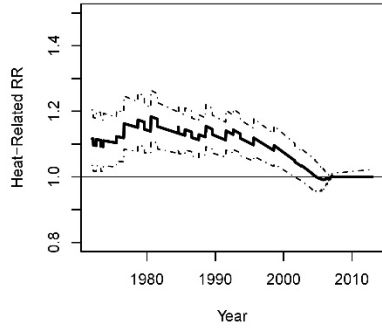

**Fukuoka (West)**

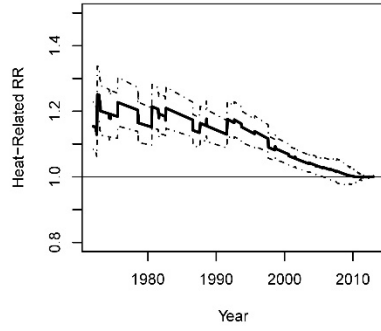

**Saga (West)**

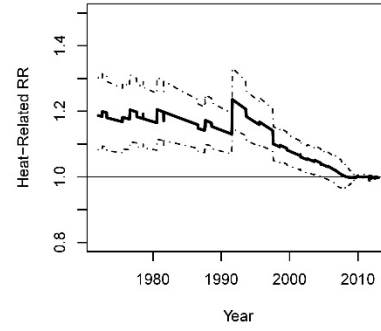



**Nagasaki (West)**

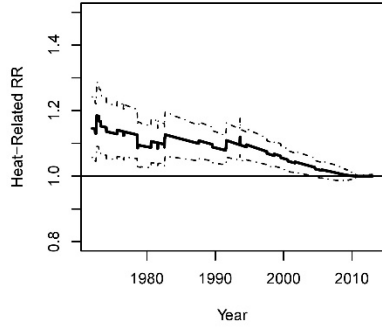

**Okinawa (West)**

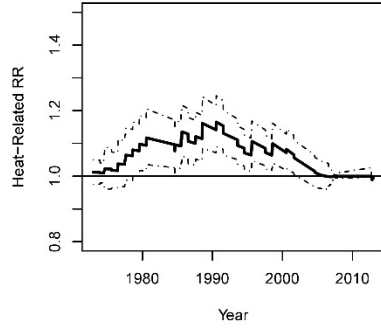

**Figure S7.** Prefecture-specific time-varying cold-related mortality risk. The cold-related risk was defined as the relative risk comparing the time-varying minimum mortality temperature (MMT) and the time-varying 1<sup>st</sup> temperature percentile. Black solid and dashed lines indicate the point estimate of the heat risk and 95% point-wise confidence intervals, respectively.

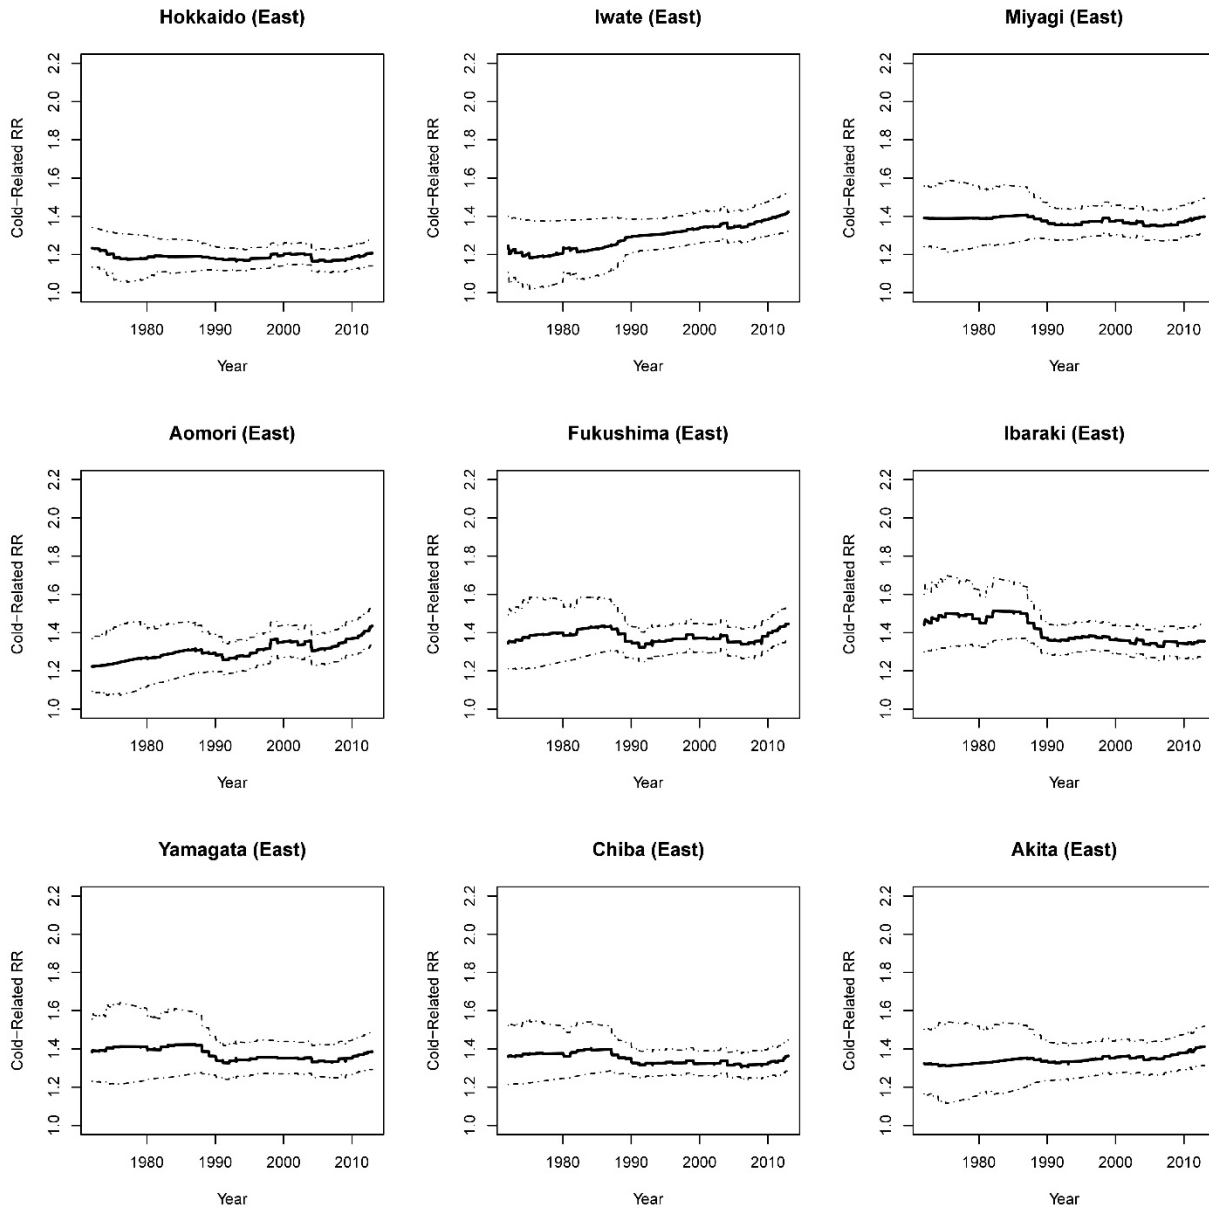

**Tochigi (East)**

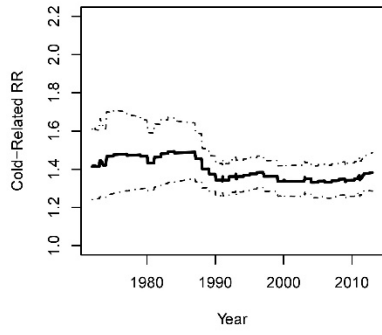

**Tokyo (East)**

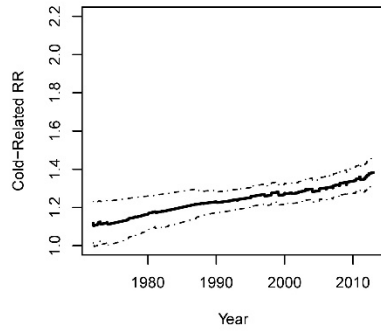

**Saitama (East)**

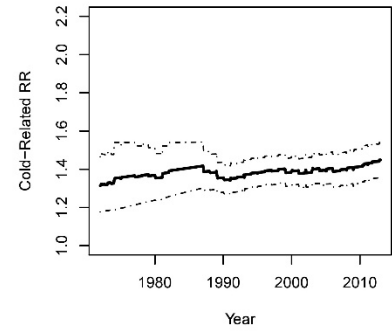

**Kanagawa (East)**

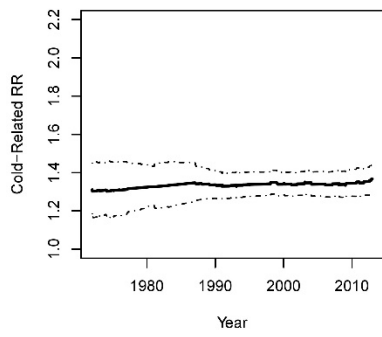

**Gunma (East)**

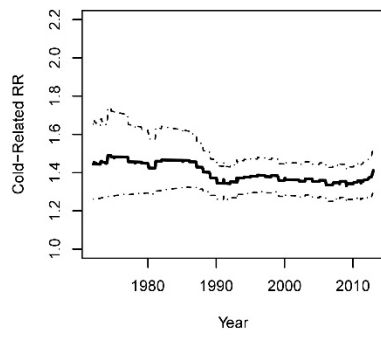

**Niigata (East)**

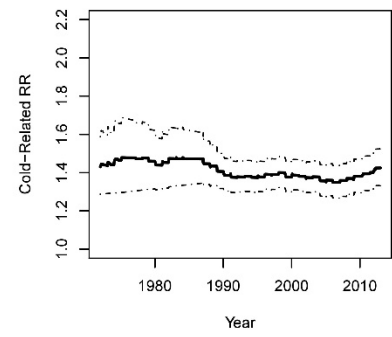

**Yamanashi (East)**

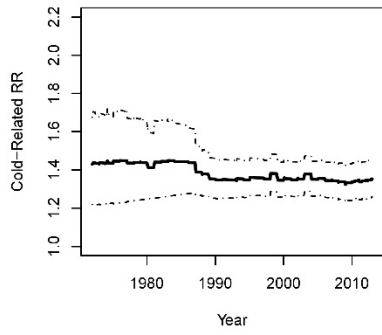

**Shizuoka (East)**

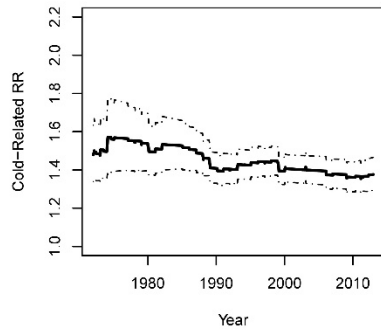

**Nagano (East)**

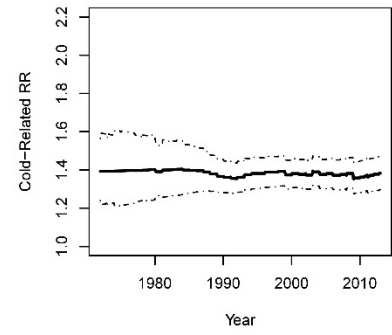

**Toyama (East)**

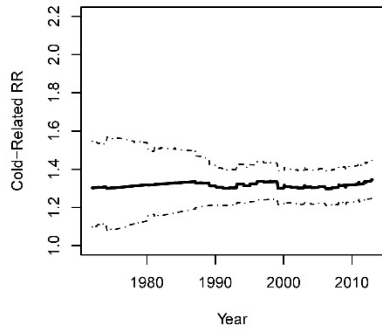

**Aichi (East)**

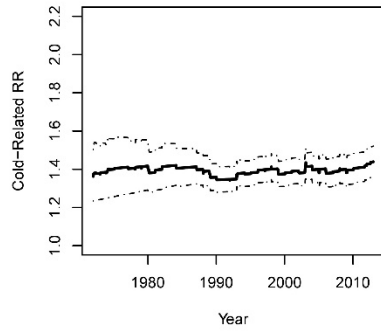

**Gifu (East)**

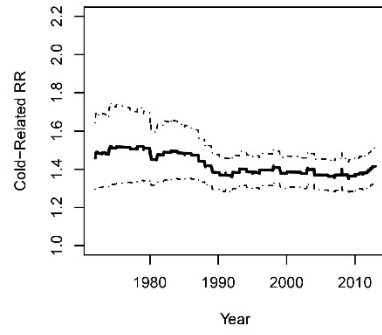

**Ishikawa (East)**

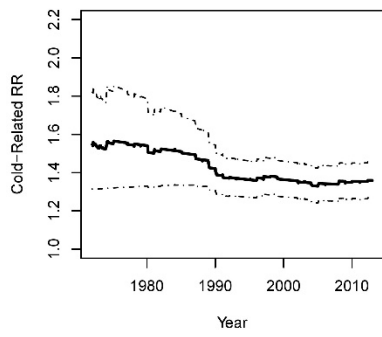

**Mie (West)**

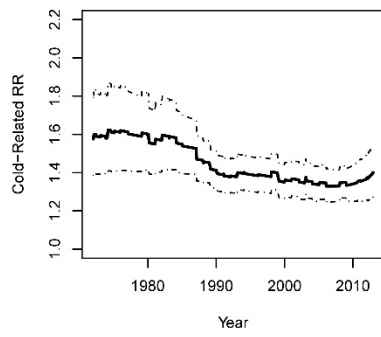

**Fukui (East)**

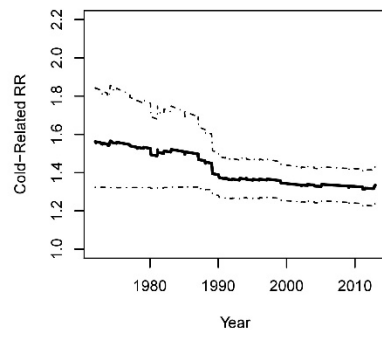

**Shiga (West)**

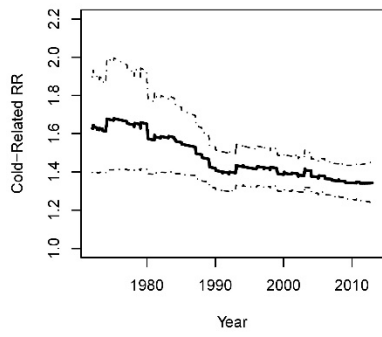

**Nara (West)**

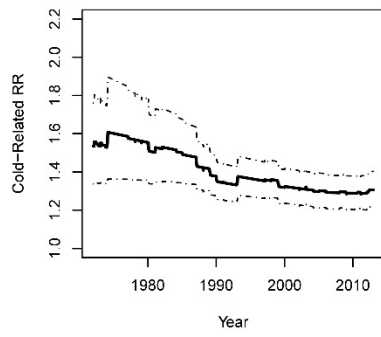

**Kyoto (West)**

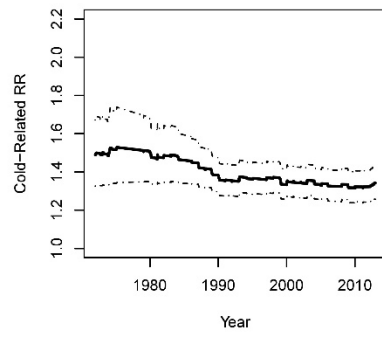

**Osaka (West)**

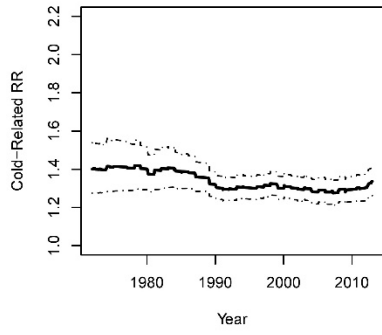

**Hyogo (West)**

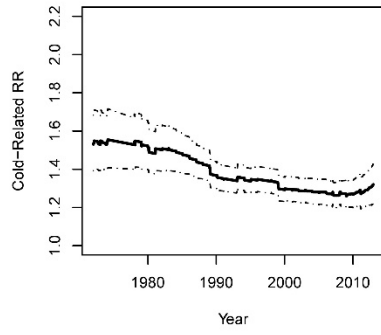

**Wakayama (West)**

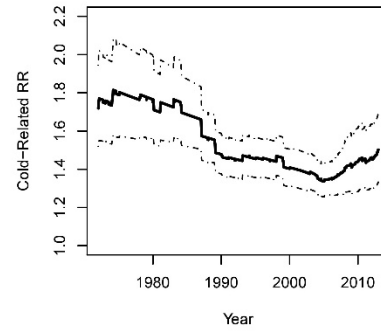

**Tokushima (West)**

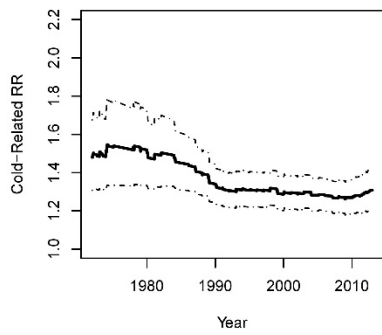

**Tottori (West)**

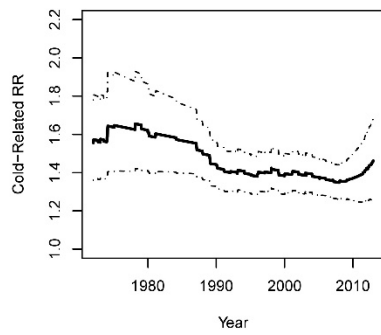

**Kagawa (West)**

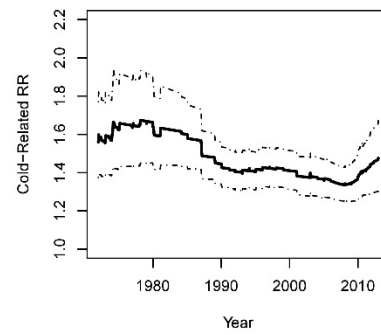

**Okayama (West)**

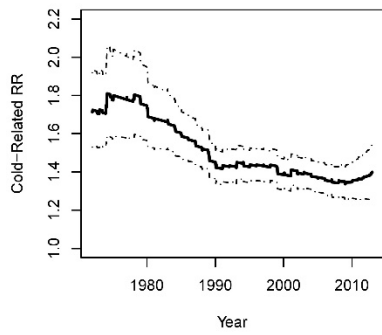

**Kochi (West)**

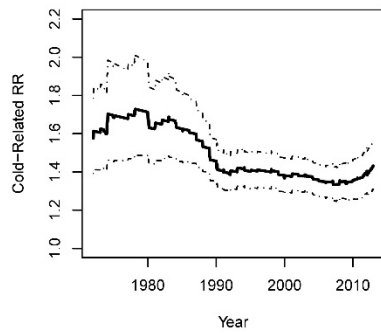

**Shimane (West)**

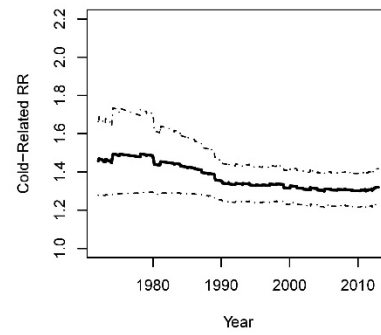



**Nagasaki (West)**

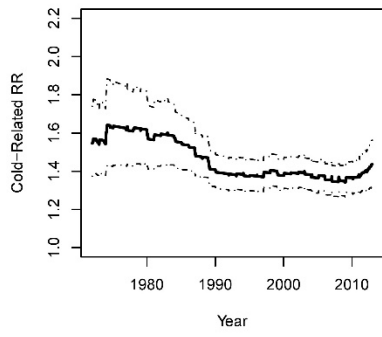

**Okinawa (West)**

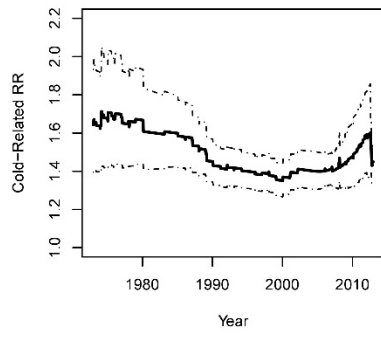

**Figure S8.** Prefecture-specific lag-cumulative relative risk (RR) curve at the first/last years (1972/2012) of the study period. Green and blue solid lines with shaded areas indicate the estimated RR curves with 95% confidence regions in 1972 and in 2012, respectively.

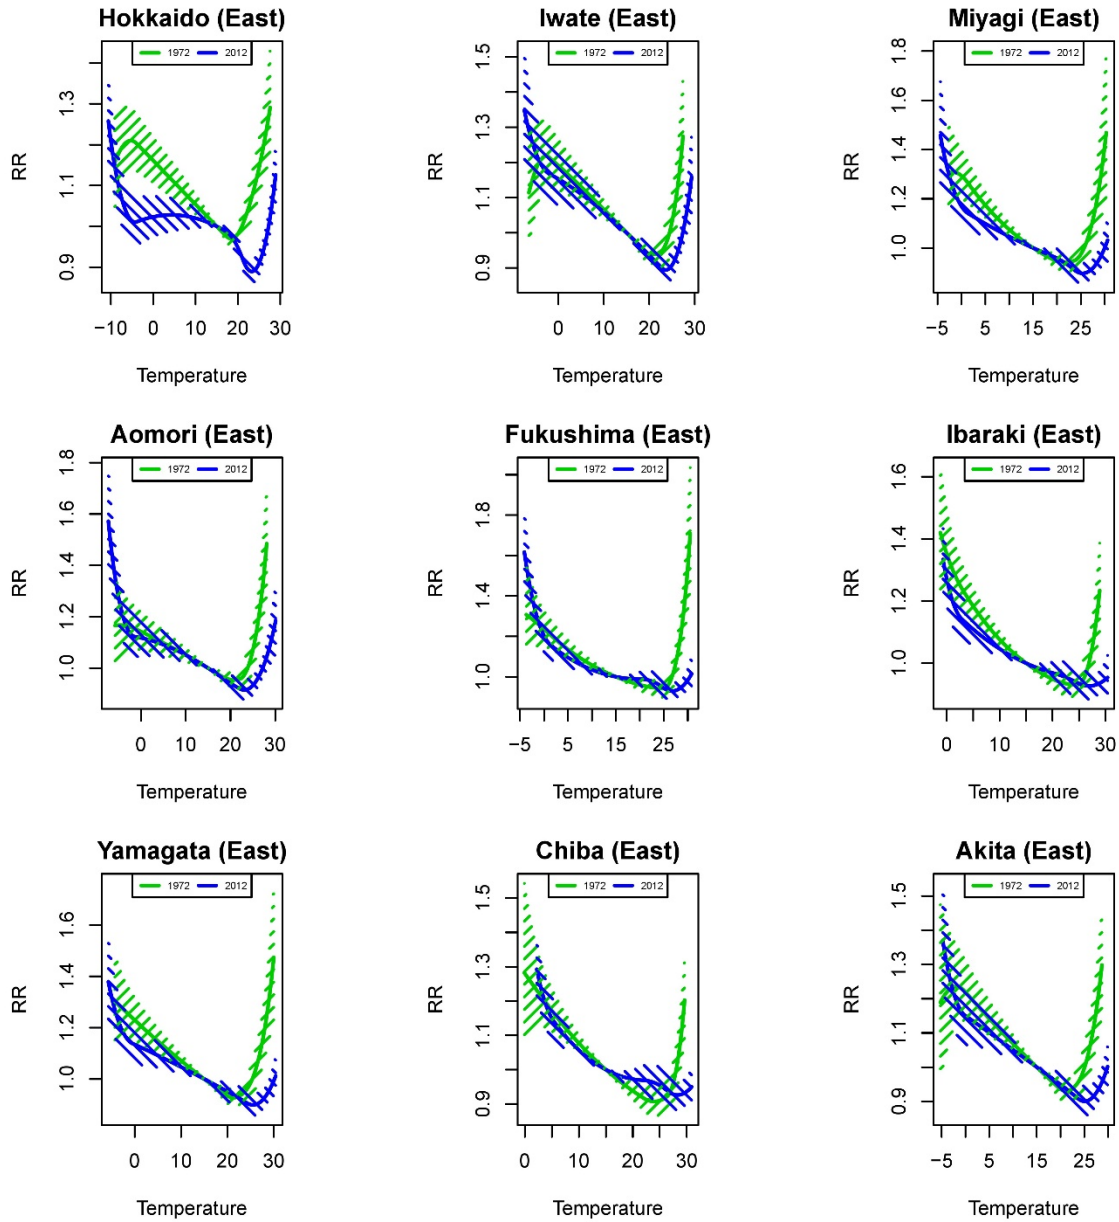



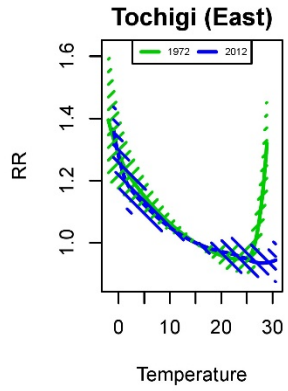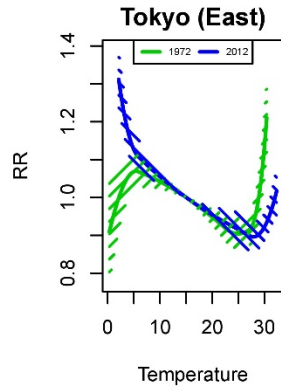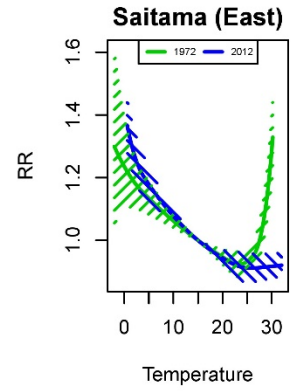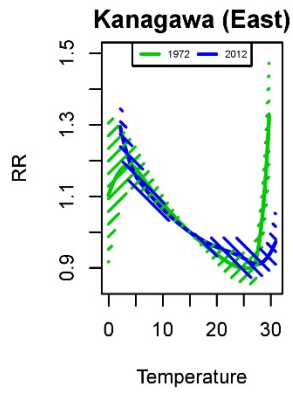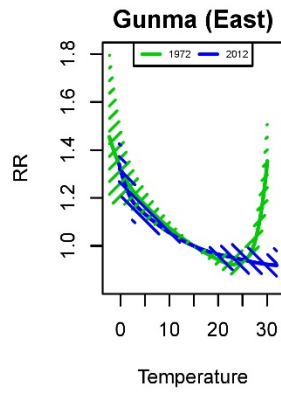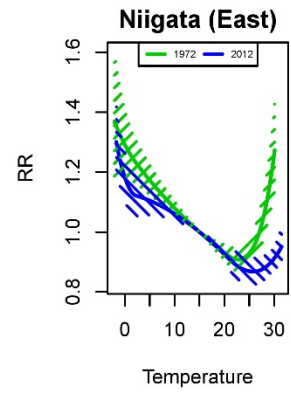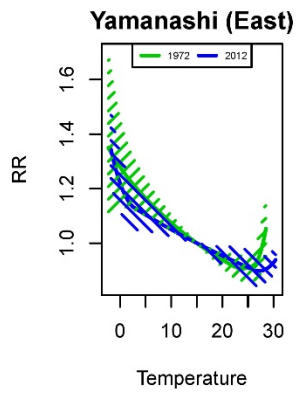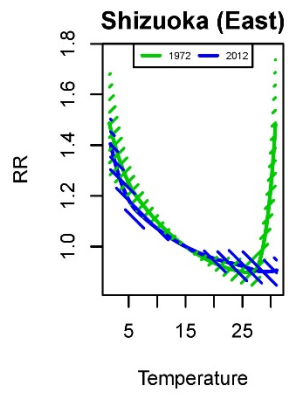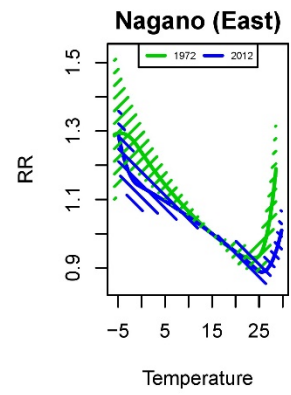

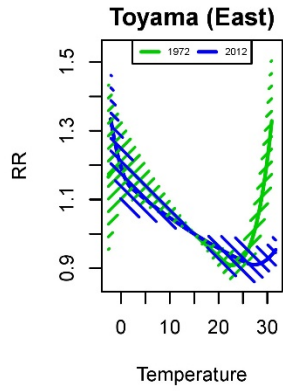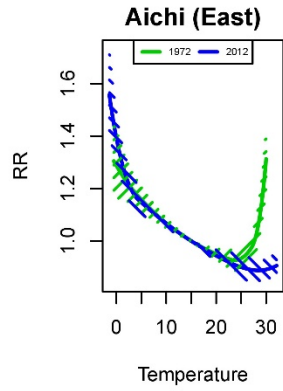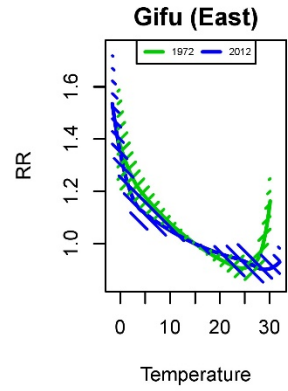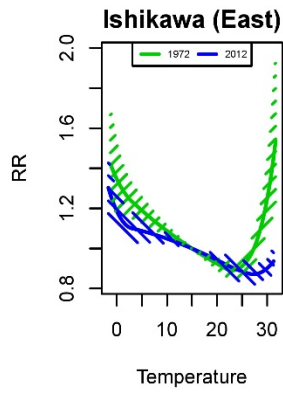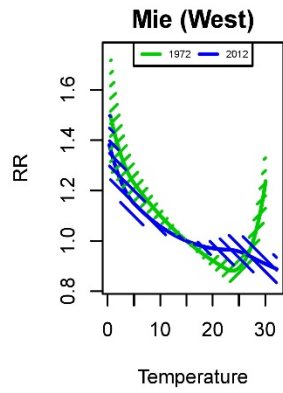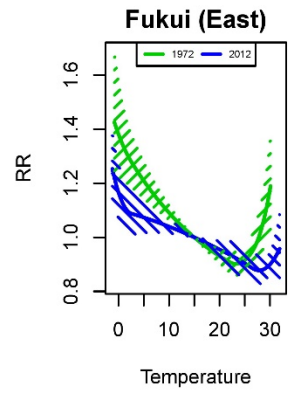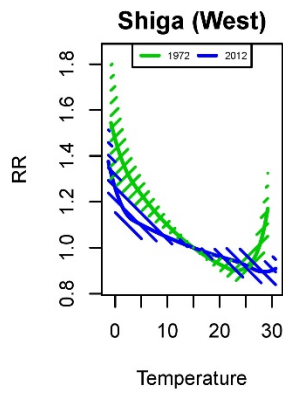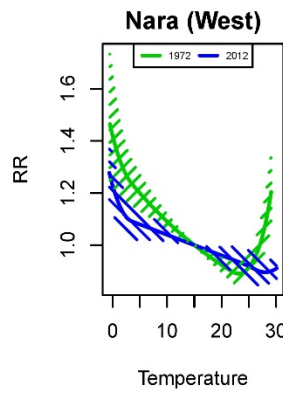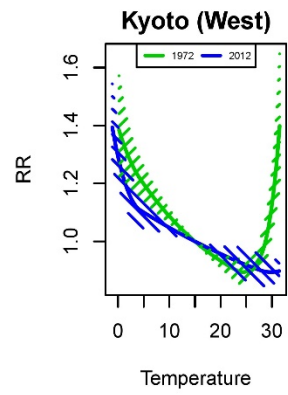

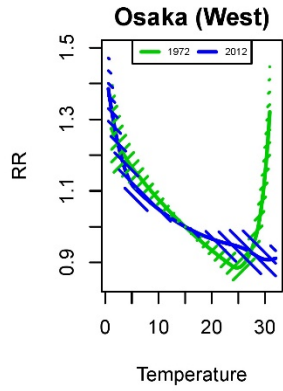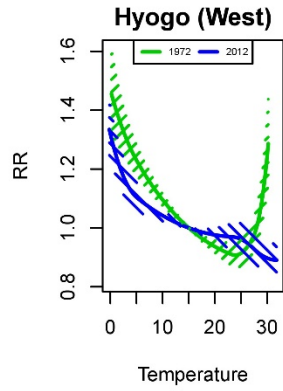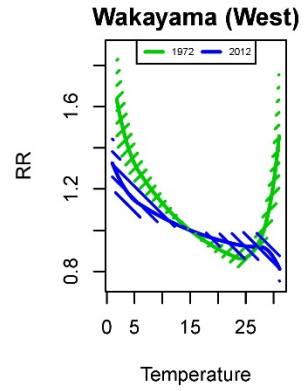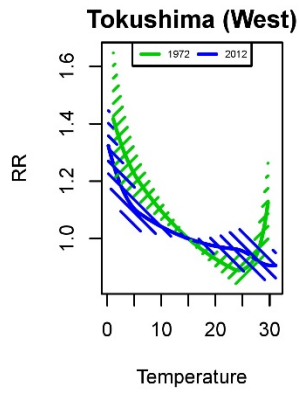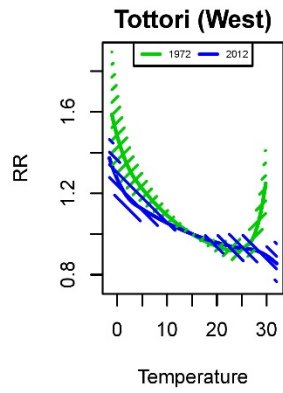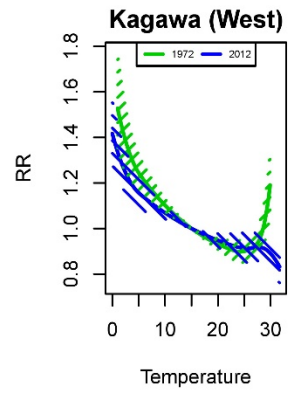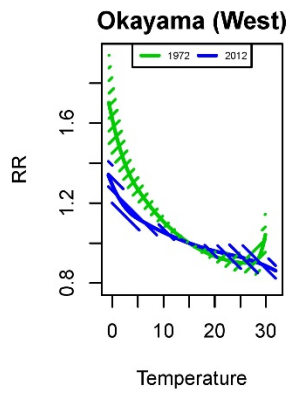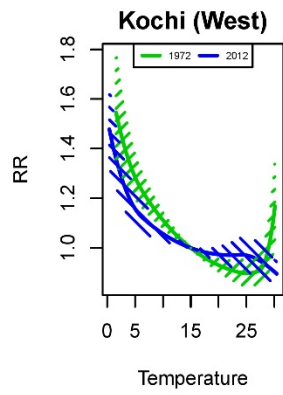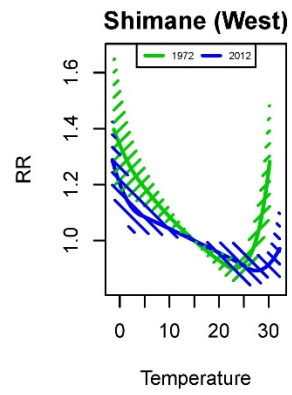

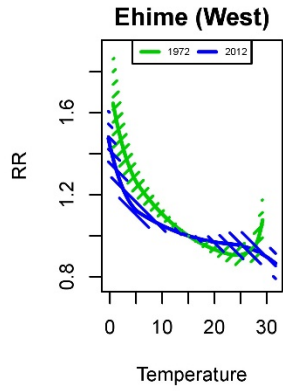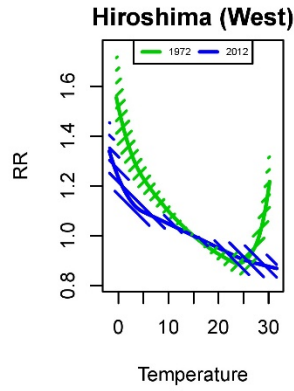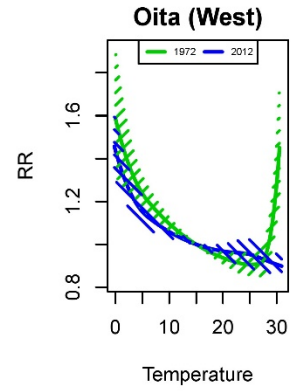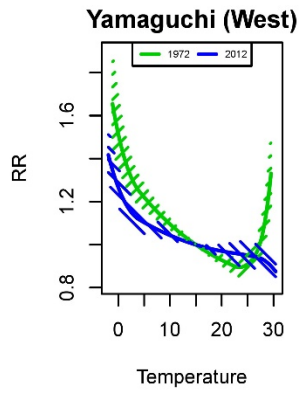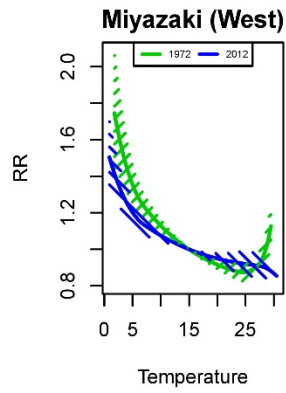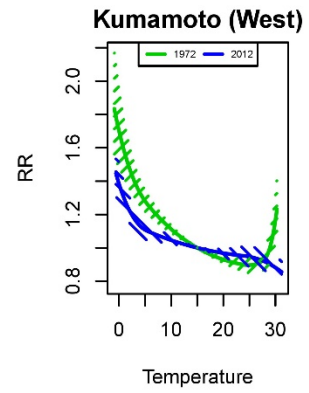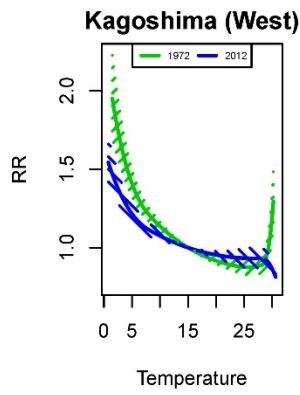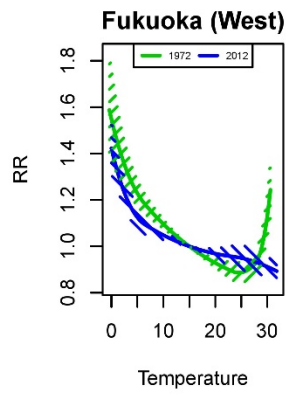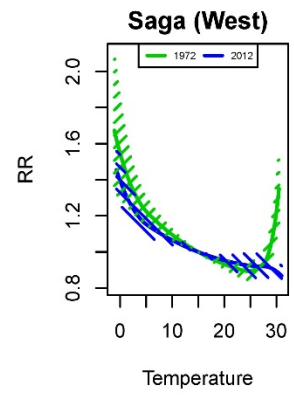

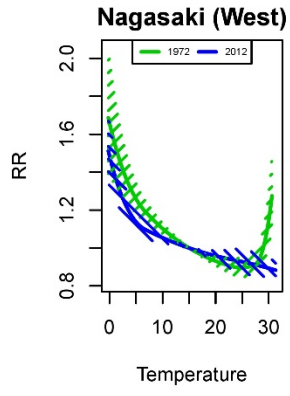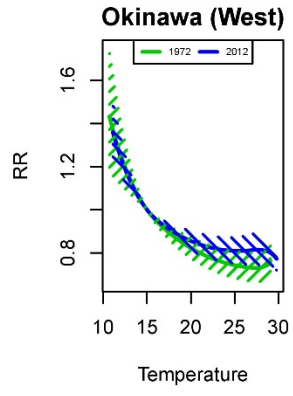

**Figure S9.** Gender-specific time-varying minimum mortality temperature (MMT) together with the time-varying minimum mortality temperature percentile (MMTP) (top), time-varying heat-related mortality risk (middle), and time-varying cold-related mortality risk (bottom). Black solid and dashed lines indicate the point estimate of the MMT and 95% point-wise confidence intervals, respectively. Blue line in the top panels indicates the MMTP.

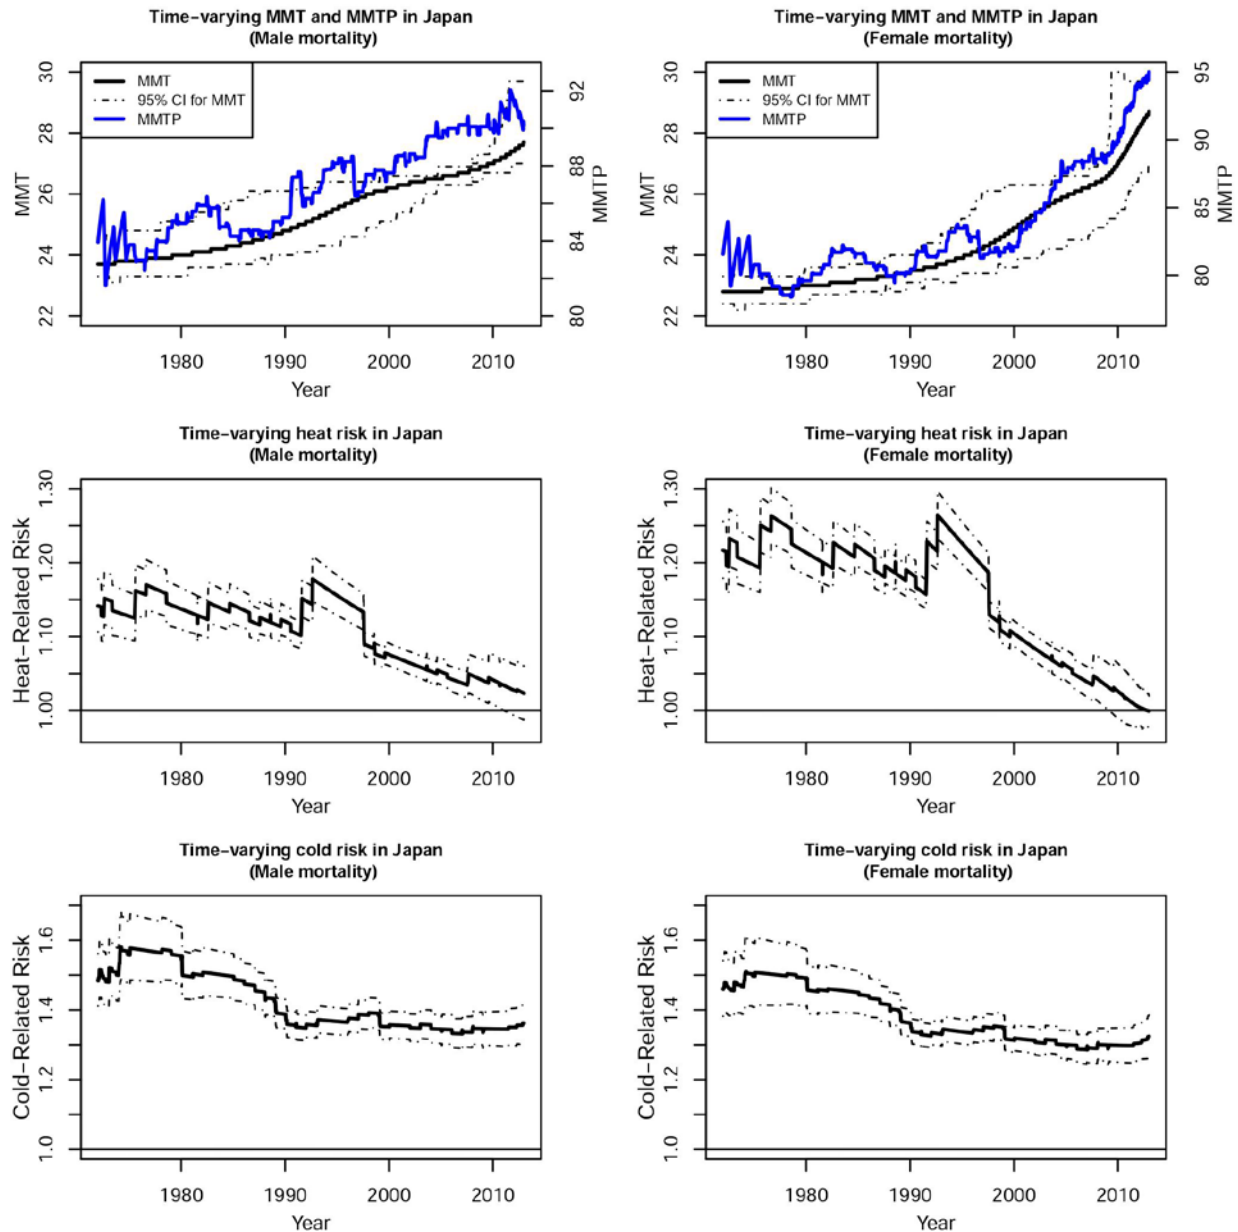

**Figure S10.** Cause-specific time-varying minimum mortality temperature (MMT) together with the time-varying minimum mortality temperature percentile (MMTP) (top), time-varying heat-related mortality risk (middle), and time-varying cold-related mortality risk (bottom). Black solid and dashed lines indicate the point estimate of the MMT and 95% point-wise confidence intervals, respectively. Blue line in the top panels indicates the MMTP.

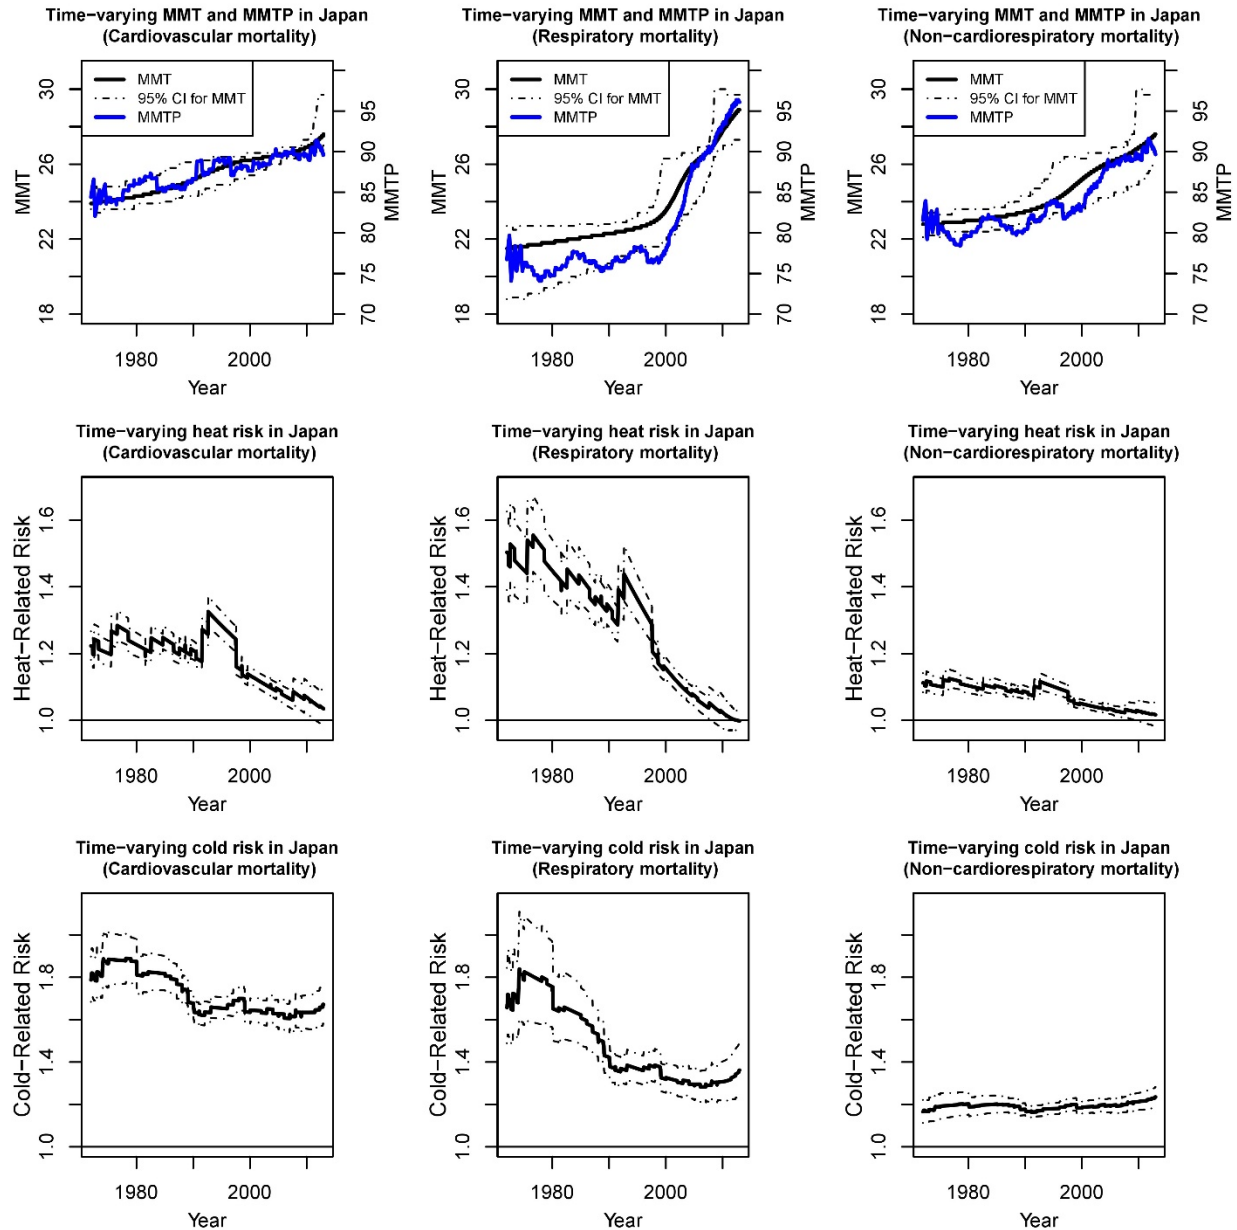

Supplement: EHP2546.s001.acco.pdf [file EHP2546.s001.acco.pdf]
